1

2

3

4

5 **BWGS: a R package for genomic selection and its application to**  
6 **a wheat breeding programme.**

7

8 **Gilles Charmet<sup>1\*</sup>, Louis Gautier Tran<sup>1</sup>, Jérôme Auzanneau<sup>2</sup>, Renaud Rincet<sup>1</sup>, Sophie Bouchet<sup>1</sup>**

9

10 <sup>1</sup> INRA-UCA, UMR GDEC– 5 chemin de Beaulieu, 63000 Clermont-Ferrand, France

11 <sup>2</sup> Agri-Obtentions, Ferme de Gauvilliers, 78660 Orsonville, France

12

13 **\*Corresponding author**

## 14 **Abstract**

15 We developed an integrated R library called BWGS to enable easy computation of Genomic Estimates  
16 of Breeding values (GEBV) for genomic selection. BWGS relies on existing R-libraries, all freely  
17 available from CRAN servers. The two main functions enable to run 1) replicated random cross  
18 validations within a training set of genotyped and phenotyped lines and 2) GEBV prediction, for a set of  
19 genotyped-only lines. Options are available for 1) missing data imputation, 2) markers and training set  
20 selection and 3) genomic prediction with 15 different methods, either parametric or semi-parametric.

21 The usefulness and efficiency of BWGS are illustrated using a population of wheat lines from a real  
22 breeding programme. Adjusted yield data from historical trials (highly unbalanced design) were used for  
23 testing the options of BWGS. On the whole, 760 candidate lines with adjusted phenotypes and genotypes  
24 for 47 839 robust SNP were used. With a simple desktop computer, we obtained results which compared  
25 with previously published results on wheat genomic selection. As predicted by the theory, factors that  
26 are most influencing predictive ability, for a given trait of moderate heritability, are the size of the training  
27 population and a minimum number of markers for capturing every QTL information. Missing data up to  
28 40%, if randomly distributed, do not degrade predictive ability once imputed, and up to 80% randomly  
29 distributed missing data are still acceptable once imputed with Expectation-Maximization method of  
30 package rrBLUP. It is worth noticing that selecting markers that are most associated to the trait do  
31 improve predictive ability, compared with the whole set of markers, but only when marker selection is  
32 made on the whole population. When marker selection is made only on the sampled training set, this  
33 advantage nearly disappeared, since it was clearly due to overfitting. Few differences are observed  
34 between the 15 prediction models with this dataset. Although non-parametric methods that are supposed  
35 to capture non-additive effects have slightly better predictive accuracy, differences remain small. Finally,  
36 the GEBV from the 15 prediction models are all highly correlated to each other. These results are

37 encouraging for an efficient use of genomic selection in applied breeding programmes and BWGS is a  
38 simple and powerful toolbox to apply in breeding programmes or training activities.

39

## 40 **Introduction**

41 The use of molecular markers to provide selection criteria for quantitative traits was first proposed by  
42 [1]. They introduced a theory for optimizing weights to be given to each marker associated with a QTL,  
43 and they demonstrated that this index was at least as efficient as the phenotypic score for the genetic  
44 improvement of a population by truncation selection. This marker-assisted-selection (MAS) approach  
45 used only markers which had been previously associated with a QTL through statistical analysis.  
46 Therefore, the number of markers remained limited, and their effects were usually estimated by solving  
47 the linear model equations. The efficiency of MAS versus phenotypic selection is higher when the trait  
48 has a low heritability, the population size is large and the QTLs explain a large proportion of the trait  
49 variation. It was shown that the use of this marker index would facilitate early selection, bypassing a trait  
50 evaluation step and thereby shortening selection cycles [2]. Consequently the genetic gain per cycle  
51 would increase. However, QTL detection is often limited in practice by experimental power, particularly  
52 by the size of the studied population, and QTL with small effects often remain undetected. Therefore,  
53 this “missing heritability” can reduce the efficiency of MAS. Subsequent studies have shown that MAS  
54 efficiency is improved when more QTLs with small effects are included [3-4], and this implied relaxing  
55 the stringency threshold of significance to allow more true QTLs being detected, despite the risk of  
56 having some false positive ones being included. Extending this reasoning, it was proposed to include all  
57 markers in the selection index, thus bypassing the QTL identification step [5]. As the number of markers  
58 is generally larger than the number of phenotypic observations, classical fixed effects regression are  
59 intractable ( $n \gg p$  problem). Therefore, [5] suggested using ridge regression models to overcome this  
60 over-parameterization problem. Soon after, [6] applied ridge and Bayesian regression models to animal  
61 populations for predicting breeding values, and called this approach Genomic Selection (GS). Marker  
62 effects are first estimated from the genotypic and phenotypic data in a training population. Then marker

63 effects are used to predict breeding values in the target population with only genotypic data, and  
64 selections are based on these Genomic Estimates of Breeding Values (GEBV). This method has been  
65 used successfully for dairy cow breeding [7]. Indeed, in the case of dairy cow breeding (and particularly  
66 for bulls), the advantages of GS over classical breeding are obvious. 1) genotyping is much cheaper (a  
67 few 10s US\$ for the 55K SNP bovine chip) than progeny testing (since bulls do not give milk), 2)  
68 genotyping can be done at birth time, while progeny testing requires >7-8 years (until bulls give daughters  
69 and daughters give milk). Therefore GS of dairy bulls allowed early selection on a larger population, thus  
70 leading to nearly doubling the genetic gain per unit of time while the costs of proving bulls were reduced  
71 by 92% [8].

72 To benefit from shorter cycles and increasing selection intensity, the genetic gain per cycle should be  
73 close to that expected from phenotypic selection (PS). This relative efficiency of GS vs PS thus relies on  
74 the ability of predicting the observed genetic value from the marker genotype. GEBV predictive ability  
75 is usually measured by the correlation between the predicted and observed values. Most reported studies  
76 on GS in plants have focused on measuring the accuracy of genomic predictions, usually assessed by  
77 cross-validation techniques [9-14].

78 In the native theory, all available markers should be used without prior selection, since the statistical  
79 models were supposed to cope with the big data problem and avoid over parametrization. However, with  
80 the advance of molecular biology, the number of markers, e.g. single nucleotide polymorphisms (SNP),  
81 can be extremely high (up to some millions), particularly when compared to a few hundreds or thousands  
82 phenotypic observations. In this case, it seems reasonable to limit the number of markers to avoid too  
83 high over parametrization or over-representation of non-informative genomic regions, as well as  
84 speeding up computation. For example, one may wish to discard markers when they are in complete (or  
85 nearly complete) LD with another, thus bringing the very same information, or selecting markers which  
86 are evenly spaced, either physically or genetically, along the genome map.

87 Molecular data often contain missing value, particularly with the so-called genotyping-by-sequencing  
88 (GBS), likely because the fraction of the genome which is re-sequenced is not exactly the same from one  
89 individual to another [15]. Most prediction models do not accept missing data, therefore an imputation  
90 step is necessary to replace missing values, and various methods have been proposed to achieve the best  
91 guess (e.g. fastphase [16]).

92 Finally, imputed data of (possibly selected) markers are used to predict GEBV using phenotypic  
93 observation in a training population. Several methods have been proposed to achieve GEBV prediction.  
94 They can be classified into parametric vs semi-parametric methods [17]. In the R environment [18],  
95 which is often used in research, several libraries have been specifically developed for genomic selection,  
96 such as BGLR [19] or rr-BLUP [20]. However, few of these packages proposes functions to successively  
97 achieve the three described steps of marker selection, genotype imputation and model prediction.

98

99 The objectives of this manuscript are 1) to describe an integrated software (pipeline) which has been  
100 developed from open-source R functions available in various R libraries to enable the three steps to be  
101 performed easily and 2) to present an application of this software to carry out genomic predictions using  
102 historical data from a bread wheat breeding programme.

103

## 104 **Materials and Methods**

105

### 106 **The BWGS pipeline**

107 In the framework of the French flagship programme BreedWheat ([www.breedwheat.fr](http://www.breedwheat.fr)), we developed  
108 an integrated pipeline based on R [18] called BWGS (BreedWheat Genomic Selection pipeline). BWGS

109 comprises three modules: 1) missing data imputation, 2) dimension reduction, for reducing the number  
110 of markers and/or training individuals and 3) Genomic Estimation of Breeding Values (GEBV) with a  
111 choice among 15 parametric and non-parametric methods.

112 The pipeline comprises two “main” functions (Fig 1)

113

114 (Fig 1 around here)

115

116 The first function called `bwgs.cv` is using both genotyping and phenotyping data from a “training” set or  
117 reference population to carry on model calibration and cross validation. Data are randomly split into  $n$   
118 “folds”, and  $n-1$  folds are used for training models and predicting the  $n^{\text{th}}$  one. Computation can be  
119 replicated  $p$  times, and correlation between GEBV and observed trait are computed for each fold and  
120 each replicate, enabling estimates of average and standard deviation of predictive ability (see [21]).

121 Once the “best” model has been chosen based on quality assessment, a second function, named  
122 `bwgs.predict` is used to build the BEST model using the whole training set (genotyping + phenotyping),  
123 then apply the model to the genotyping data of the target population to get GEBV of these new genotypes.

124 Candidate lines of the target population can then be ranked according to GEBV for single trait  
125 (truncation) selection.

126 Going into more details of the pipeline, the workflow comprises three main steps:

127 1. A step of (missing) genotyping data imputation. This option can be useful for sources of  
128 genotyping data such as GBS. The following options are available:

- 129       • MNI: missing data are replaced by the mean allele frequency of the given marker. This imputation  
130       method is only suited when there are a few missing values, typically in marker data from SNP  
131       chips or KasPAR.
- 132       • EMI: missing data are replaced using an expectation-maximization methods described in function  
133       A.mat of R-package rrBLUP [20]. This algorithm was specially designed by Poland et al (2012)  
134       for the use of GBS markers, which usually give many missing data which are roughly evenly  
135       distributed. However, it does not use physical map position, as do other more sophisticated  
136       software (e.g. Beagles, [22]). For imputing low density genotyping of a large population to high  
137       density available for only a subpopulation, i.e. many markers with many missing data, such  
138       software should be used before BWGS.
- 139       **2.** A step of dimension reduction, i.e. reducing the number of markers. This reduction could be  
140       necessary to speed up computation on large datasets, depending on computer resources available.  
141       The following methods are available
- 142       • RMR: Random sampling (without replacement) of a subset of markers. To be used with the parameter  
143       “reduct.marker.size”.
- 144       • LD (with r2 and MAP): enables “pruning” of markers which are in LD > r2. Only the marker with  
145       the least missing values is kept for each pair in LD>r2. To allow faster computation, r2 is estimated  
146       chromosome by chromosome, so a MAP file is required with information of marker assignment to  
147       chromosomes.
- 148       • ANO (with pval): one-way ANOVA are carried out with R function lm on trait “pheno” Every  
149       markers are tested one at a time, and only markers with pvalue<pval are kept for GEBV prediction



- 150 • ANO+LD (with pval and r2, MAP is facultative): combines a first step of marker selection with  
151 ANO, then a second step of pruning using LD option.

152 For research or teaching purposes, an option for randomly sampling individuals has been added, although  
153 it is little useful in practical breeding applications. Options for selecting a subset of the training  
154 population are:

- 155 • RANDOM: a subset of sample.pop.size is randomly selected for training the model, and the  
156 unselected part of the population is used for validation. The process is repeated nFolds \* nTimes to  
157 have the same number of replicates than with cross-validation.
- 158 • OPTI: the optimization algorithm based on CDmean [23] to select a subset which maximizes average  
159 CD (coefficient of determination) in the validation set. Since the process is long and has some  
160 stochastic components, it is repeated only nTimes.

161

### 162 3. A step of model building and cross validation.

163 In the general case of genomic selection, the number of explanatory variables, *i.e.* markers, (largely)  
164 exceeds the number of observations, making the classical linear model equation unsolvable. In a review,  
165 [24] classified most of the methods that have been proposed to overcome this “big data” problem, into  
166 penalized regression (to make them solvable) or semi-parametric methods. Moreover, regression can be  
167 solved either analytically as in ridge regression (equivalent to G-BLUP) or iteratively though Bayesian  
168 computations. Bayesian methods can differ by the prior density distribution of marker effects, which can  
169 be modified boundlessly. In their review [24] describe the main features (e.g. prior...) for 13 methods.

170 The options available for genomic breeding value prediction are:

- 171       • GBLUP: performs G-BLUP using a marker-based relationship matrix, implemented through  
172       rrBLUP R-library. Equivalent to ridge regression (RR-BLUP) of marker effects.
- 173       • EGBLUP: performs EG-BLUP, i.e. BLUP using a “squared” relationship matrix to model  
174       epistatic 2x2 interactions, as described by [25] using the BGLR library
- 175       • RR: ridge regression, using package glmnet [26]. In theory, strictly equivalent to GBLUP.
- 176       • LASSO: Least Absolute Shrinkage and Selection Operator is another penalized regression  
177       methods which yield more shrunk estimates than RR. Run by glmnet library.
- 178       • EN: Elastic Net [27] which is a weighted combination of RR and LASSO, using glmnet library
- 179   Several Bayesian methods, using the BGLR library
- 180       • BRR: Bayesian ridge regression: same as rr-blup, but Bayesian resolution. Induces homogeneous  
181       shrinkage of all markers effects towards zero with Gaussian distribution [24].
- 182       • BL: Bayesian LASSO: uses an exponential prior on marker variances priors, leading to double  
183       exponential distribution of marker effects [28].
- 184       • BA: Bayes A uses a scaled-t prior distribution of marker effects [6].
- 185       • BB: Bayes B, uses a mixture of distribution with a point mass at zero and with a slab of non-zero  
186       marker effects with a scaled-t distribution [29].
- 187       • BC: Bayes C same as Bayes B with Gaussian a distribution for non-zero marker effects[19]
- 188       A more detailed description of these methods can be found in  
189       (<http://genomics.cimmyt.org/BGLR-extdoc.pdf>.)

190

191 Four semi-parametric methods

- 192 • RKHS: reproductive kernel Hilbert space and multiple kernel MRKHS, using BGLR [30-31].  
193 Based on genetic distance and a kernel function to regulate the distribution of marker effects.  
194 This methods is claimed to be effective for detecting non additive effects.
- 195 • RF: Random forest regression, using randomForest library [32]. This method uses regression  
196 models on tree nodes which are rooted in bootstrapping data. Supposed to be able to capture  
197 interactions between markers.
- 198 • SVM: support vector machine, run by e1071 library. For details, see LIBSVM: a library for  
199 Support Vector Machines <https://www.csie.ntu.edu.tw/~cjlin/papers/libsvm.pdf>
- 200 • BRNN: Bayesian Regularization for feed-forward Neural Network, with the R-package BRNN  
201 [33]. To keep computing time in reasonable limits, the parameters for the brnn function are  
202 neurons=2 and epochs = 20.

203 The criteria used to estimate model's quality are 1) the Pearson correlation between adjusted  
204 phenotype and GEBV, computed over the whole data set (i.e. by merging the value from the nFolds)  
205 and 2) the square-root of the mean-squared error of prediction RMSEP. These criteria are provided  
206 for each replicate (nTimes) as well as mean and standard deviation over replicates. A table  
207 summarizes phenotype, estimated breeding value and its standard deviation, as well as the coefficient  
208 of determination for each individual GEBV computed as  $CD = \sqrt{1 - (SD(GEBV)^2 / VAR(GEBV))}$ ,  
209 when the package used does provide estimate of variance and standard deviation of GEBV, as it is  
210 the case for BGLR.

## 211 **Application to real wheat breeding: plant materials and phenotypic data**

212 A training population was built by gathering historical data from the INRA-Agri-Obtentions breeding  
213 programmes. To obtain robust phenotypes, we kept data from lines which have been evaluated in  
214 multisite trials (> 6 locations), usually for 1-2 years. They were developed from inbred lines crosses,  
215 followed by 6-8 generations of self-pollination. Few selection is made during the first 3 generations (i.e.  
216 F2 to F4), which are harvested in bulk, then visual selection on simple traits is made on plants or rows at  
217 generations F4 and F5. Selected F5 families are multiplied in field plots, which allow a rough evaluation  
218 of yield. Then enough seeds are available and selected lines are put into the evaluation network, usually  
219 at the F7 generation, when breeding lines are nearly homozygous. Typically, about 300-400 pair crosses  
220 are made each year, 120-150 F7 lines are put into first year multisite trials, then 50-60 are evaluated for  
221 a second year, and the very happy few (1-3) are then entering the official registration trials in France, to  
222 hopefully become a commercial variety, 10-12 years after the initial crosses. On the whole, our database  
223 for field data had 77,176 records on 1715 genotypes, *i.e.* 45 single plot measurements per genotype,  
224 spread over 15 years (2000-2014), 10 locations in France and two managements (high vs low inputs). Of  
225 course these data are highly unbalanced, each genotype being evaluated, on average, during 1.5 years in  
226 7.60 environments (site x year) with usually two replicates by management, and most connections in the  
227 design are between two successive years, with a few control varieties (usually four in each trial) being  
228 evaluated on a longer period. These figures are for grain yield, the most documented trait. The whole  
229 dataset is described in [34] and can be recovered at [urgi.versailles.inra.fr](http://urgi.versailles.inra.fr) (INRA Small Grain Cereals  
230 Network Phenotypic Trials dataset). To illustrate the use of BWGS, we will concentrate on grain yield  
231 in high input management, *i.e.* an estimate of the genetic and climatic potential in each environment.

232 These highly unbalanced raw data require a pre-treatment step to correct for non-genetic factors as much  
233 as possible. The following mixed model was applied to estimate “corrected” genotypic means (BLUE)  
234 using the mixed model in R (library lme4):

235  $Y = \text{lmer}(\text{yield} \sim \text{geno} + (1|\text{year}:\text{site}:\text{trial}:\text{block}) + (1|\text{year}:\text{site}:\text{geno}))$ , where : stands for nested effects, e.g.  
236 block within trial within year.

237 Where geno being the main genotypic effect (fixed) and all other effects being considered as random  
238 effects to be corrected for. Note that these genotypic “BLUE” are highly correlated ( $r=0.94$ ) with BLUP  
239 estimates (*i.e.* when genotypes are also considered as random effects with identity matrix for modelling  
240 covariances). But BLUE are not shrunked, and thus can be more easily used in a second step involving  
241 mixed modelling.

242 The same model with geno as random effect was used to estimate variance components and rough  
243 estimate of broad sense heritability as  $\sigma_g^2 / (\sigma_g^2 + \sigma_{ge}^2 / \text{nenv} + \sigma_e^2 / \text{nplot})$

244 Where  $\sigma_g^2$  is the genotypic variance component,  $\sigma_{ge}^2$  is the GxE variance component (*i.e.* year:site:geno)  
245 and  $\sigma_e^2$  is the residual variance. nenv is the average number of environments per genotype and nplot the  
246 average number of plots per genotype in the dataset used.

247 Out of these “HQ-phenotyped” lines, 760 were also genotyped with the TaBW280K SNP chip [35] and  
248 used for testing BWGS. After quality check, a matrix of 188,406 high quality, polymorphic markers was  
249 finally used. To illustrate BWGS pipeline, we used a subset of 60,912 markers with consolidated map  
250 position.

251 Cross Validation used randomly sampled 90% of the genotypes as the training set and the remaining 10%  
252 genotypes as the “validation set”. The resampling process was iterated 100 times to estimate an empirical  
253 mean and standard deviation. Since the true breeding value was unknown, predictive ability (PA) was

254 measured by the Pearson correlation between GEBVs and the adjusted phenotypic values (BLUE) across  
255 all folds, i.e. the Hold accuracy, which is supposed to be less biased than a fold-by-fold estimate [36].

256

## 257 **Results**

### 258 **Summary statistics of the breeding population.**

259 Genotypic data have been used to estimate the additive relationships matrix according to [37] with the  
260 `A.mat` function of the R package `rrblup`. After scaling on a 0-1 scale (1 on diagonal), the values can be  
261 regarded as estimates of coancestry coefficients, whose distribution is shown in Fig 2a. Omitting the  
262 diagonal, coancestry coefficients range between 0.05 and 0.5, with a median around 0.18, i.e. slightly  
263 less than the value expected for half-sibs. The heat map of Fig 2b displays no clear-cut structure into  
264 distinct groups, although some groups along the diagonal are made of lines that are more related than  
265 average. Such absence of structure allows the use of random sampling cross-validation. A plot of  
266 principal component analysis of Euclidian distance matrix among the 760 lines (Fig 2c, R command  
267 `cmdscale`) again does not show any clear structure according to the year of first evaluation, thereby  
268 justifying again the use of random cross-validation over years.

269

270 (Fig 2 around here)

271

272

### 273 **Imputation of missing data**

274 The first step of data cleaning with MAF=5% and maximum marker missing data = 20% led to retain  
275 47,839 markers out of 60,912. Since adjusted Yield BLUE were complete for the 760 genotypes, the  
276 final dimension of geno matrix was 760 x 47,839. This SNP dataset contained on average 0.93% of  
277 missing data. Given the small proportion of missing data, no difference in predictive ability was  
278 observed between the two imputation methods. To test the efficiency of imputation methods on  
279 prediction accuracy, we generated new genotypic matrices with 20%, 40%; 60% and 80% of missing  
280 data, randomly distributed in the dataset. Imputation by mean allele frequency took 0.15 minute, while  
281 imputation by the EM algorithm of A.mat took around 15 minutes, whatever the proportion of missing  
282 data. Predictive ability for grain yield from imputed dataset using the two methods is presented in Fig  
283 3. The two methods give similar results for up to 20% missing Data, then imputation by EMI allows  
284 higher predictive abilities than imputation by the mean allele frequency. When 80% missing data are  
285 randomly generated, the predictive ability of EMI-imputed set is still 0.418, while it drops to 0.329  
286 with the MNI-imputed set.

287 Fig. 3 around here

288

289

## 290 **Effects of sampling markers**

291 Table 1 shows the number of markers selected by either one-way ANOVA at different pvalue  
292 thresholds, or by pruning markers with LD > threshold values from 0.5 to 0.98. For ANOVA selection,  
293 two strategies have been used, namely 1) GWAS was carried out only once using the whole dataset, i.e.  
294 training + validation lines and 2) GWAS was carried out using training lines only, i.e within each time

295 x fold replicate. Predictive abilities achieved with the selected marker subsets are also shown in Table  
 296 1.

297 Results are also displayed in Fig 4.

298

| random selection |              | GWAS     |            | GWAS whole set | GWAS training set | LD pruning   |            |              |
|------------------|--------------|----------|------------|----------------|-------------------|--------------|------------|--------------|
| Nb markers       | Pred ability | Pvalue   | Nb markers | Pred ability   | Pred ability      | LD_threshold | Nb markers | Pred ability |
| 47739            | 0.525        | 1.0      | 47839      | 0.526          | 0.526             |              |            |              |
| 25000            | 0.52         | 0.05     | 14390      | 0.573          | 0.528             | 0.98         | 15773      | 0.538        |
| 10000            | 0.515        | 0.01     | 8325       | 0.579          | 0.529             | 0.95         | 9297       | 0.541        |
| 5000             | 0.514        | 0.001    | 4000       | 0.596          | 0.519             | 0.9          | 6661       | 0.54         |
| 2000             | 0.505        | 0.0001   | 1820       | 0.614          | 0.515             | 0.8          | 4462       | 0.544        |
| 1000             | 0.493        | 0.00001  | 806        | 0.576          | 0.473             | 0.7          | 3234       | 0.536        |
| 500              | 0.447        | 0.000001 | 323        | 0.551          | 0.438             | 0.6          | 2376       | 0.527        |
| 200              | 0.392        |          |            |                |                   | 0.5          | 1704       | 0.521        |
| 100              | 0.299        |          |            |                |                   |              |            |              |

299

300 Table 1: Number of markers and predictive abilities achieved with marker subset from 1) random  
 301 selection (RMR option); 2) GWAS on whole marker set (option ANO); 3) GWAS on training set only  
 302 (not included) and 4) LD-pruning.

303

304 Fig 4 around here

305

306 As expected, predictive ability increases with the number of randomly sampled markers, with a steady  
 307 plateau above around 5000 markers and a best predictive ability of 0.525. This clearly shows that the  
 308 extent of LD is large enough in such elite breeding lines to allow most QTLs for yield being captured  
 309 with 5000-10000 markers, i.e. on average one every 1.7 Mbase. This is illustrated by marker selection



310 based on LD-pruning, i.e. removing markers which are in LD > threshold with any other marker. The  
311 marker with the least number of missing value is conserved, otherwise the choice is random. The  
312 highest value of 0.544 is obtained with 4462 markers with pairwise LD >0.8. When marker selection is  
313 based on ANOVA carried out on the entire population, there is an optimum predictive ability of 0.614  
314 achieved with 1820 markers (pvalue = 0.0001). However, these results were only found when marker  
315 selection is made only once by association analysis on the whole dataset, which is then split into a  
316 training and a validation set. When marker selection is made within the loop only in the training set,  
317 then the predictive ability of the validation set is only slightly improved for N= 2000 and 5000  
318 markers, compared to random sampling, but never exceeds the predictive ability achieved with the  
319 whole set of markers. This clearly illustrates that overfitting does occur in the first case.

320

## 321 **Effect of different calibration set sampling strategies on prediction**

### 322 **accuracy**

323 For this study, we used the whole set of 47,839 markers; which gave a predictive ability of 0.525 in 10-  
324 fold cross validation using the complete dataset of 760 breeding lines, i.e. with a training set of 684  
325 lines and a validation set of 76 lines. Predictive ability was estimated with GBLUP using calibration set  
326 of size CS= 50, 100, 200, 300, 400, 500, 600 and 700, validation being made using the remaining lines.  
327 Fig 5 shows the increase of both predictive ability and computing time as the size of training set  
328 increases. Computing time is given as the proportion of that needed for 100 replicates x 10 folds with  
329 TS = 700, which was roughly 60 minutes. As expected, predictive ability does increase with the size of  
330 calibration set, while its variability decreases, with the notable exception of TS = 700. This may be due  
331 to the small size of the validation set, which is only 76 with TS = 700, making correlations between  
332 phenotype and GEBV more erratic than those observed with larger validation sets.

333

334 Fig 5 around here

335

336 Two strategies were compared as illustrated in Fig 6: 1) the random sampling among the 760 lines as  
337 in Fig 5 and 2) selecting an optimized subset with the CD-mean criteria as described by [23]. Although  
338 this algorithm should be deterministic and give always the same subset, some stochasticity remains in  
339 the drop-replacement procedures, which explains that predictive ability still have some residual  
340 variation as illustrated by the error-bar. Fig 6 shows that the optimization algorithm does improve  
341 predictive ability for small-medium size of the training set compared to random sampling. as predicted  
342 by the theory and already reported [23]. This advantage disappears when the proportion of sampled  
343 individuals increases.

344

345 Fig 6 around here

346

## 347 **Efficiency of various prediction methods**

348 With again the whole set of 47,839 markers, we used all prediction methods available in BWGS to  
349 estimate prediction accuracy in 100 independent 10-fold cross validations. Computing time varied  
350 considerably from one method to another, as illustrated in Fig7. BRNN is, by far, the most demanding  
351 methods, with 2214 minutes (nearly 4 days) needed to carry out 100 replicates of 10-folds cross  
352 validation, while the least demanding is GBLUP with 28 minutes. Of course these values must be taken  
353 only for comparison, as they are highly dependent on the computer characteristics. Note that EGBLUP,

354 which is an extension of GBLUP with epistatic interactions being modelled by the product of additive  
355 relationship matrix with itself, takes 344 minutes instead of 28. The other computationally intensive  
356 methods are multi-kernel RKHS (637 minutes) and random Forest RF (382 minutes).

357 In Fig 7, we discarded results from SVM methods, which gave very poor predictive ability (0.25),  
358 although in a reasonable time of 31 minutes. Predictive abilities of the other 14 methods range from  
359 0.475 to 0.543, with no relationship with computing time, which can be considered as an estimate of  
360 method complexity. Note that the support vector machine SVM compared with other methods when  
361 5000 random markers are used, but seemed to be unable to deal with 47,000 markers. LASSO and  
362 elastic net (from glmnet library) and BRNN give the worse predictive abilities around 0.48, while  
363 random forest regression RF gives the highest of 0.543, slightly above that of the reference GBLUP  
364 (0.525). Note that the three methods that outperform GBLUP are thought to take into account non  
365 additive marker effects. However, in this practical case of grain yield prediction, they did not show a  
366 dramatic advantage over GBLUP. BRNN is another model-free, machine learning method, often  
367 supposed to give more accurate prediction than linear regression methods. The relatively poor  
368 predictive ability observed in this study can be caused by insufficient computer resources allocated.  
369 Other parameterization (e.g. number of neurone layers, epochs...) may have given better predictive  
370 abilities.

371

372 Fig 7 around here

373

374 Perhaps as important as predictive ability is the consistency of GEBV estimated by different methods.  
375 Fig 8 shows the correlation between GEBV (averaged over the 100 replicates) predicted by the 14  
376 successful methods (omitting SVM). The minimum correlation of 0.85 is between random Forest and

377 Bayesian ridge regression, while many pairwise correlation are close to 1. When omitting RF, which is  
378 the method whose prediction are least related to the others, all correlations are above 0.92, thus all  
379 methods can be considered as giving highly consistent prediction of GEBV.

380

381 Fig 8 around here

382

## 383 **Discussion**

384 Genomic selection programmes are now routinely used in dairy cow breeding, and benefit from huge  
385 phenotypic data recorded in past years on milk production of thousands of females, usually related by  
386 well-known pedigree relationships (i.e. mother and father known without error). This is however not yet  
387 the case in other species like sheep, although effort are being developed in so-called minor species.  
388 Therefore, using a relatively cheap genotyping, dairy cow breeders usually have very large population  
389 for training GS models, which led to highly accurate predictions. In many animal studies, the oldest  
390 animals are used as training set and the youngest as validation set.

391 Contrasting with animal breeding, most plant breeding programmes do not have very large population  
392 sizes, although each breeding company manipulates hundreds or thousands of candidates, since  
393 companies are usually reluctant to share and merge datasets. Breeding companies have developed in-  
394 house biostatistical tools for calculating GEBV with semi-automated pipeline, since time is often short  
395 between data production (e.g. grain harvest) and selection decision (e.g. sowing next generation). There  
396 are also several publically available tools which have been developed, particularly as R libraries. Among  
397 the most popular we can mention glmnet [26], BGLR [19], rrBLUP [20] or Synbreed [38]. Recently,  
398 integrative packages have been developed, which rely on existing public R-libraries. An example of such

399 packages are G2P and the one presented here called BWGS. G2P [39] proposes 17 prediction methods  
400 from 10 R-libraries, among which BGLR, glmnet and randomForest as in BWGS. As BWGS, there are  
401 also two main functions, G2PCrossValidation and G2P to apply prediction model to a test set with only  
402 marker data. Compared to BWGS, G2P offers much more options for tuning parameters of the numerous  
403 functions/libraries called by the two main functions. As a drawback, handling G2P appears more  
404 complex, and its complete use requires reading the notices of original libraries, since the notice of G2P  
405 does not provide enough details on the possible parameters and options. Moreover, although G2P does  
406 content a quality control module, it is not directly integrated into the main function as in BWGS.  
407 Comparatively, in BWGS, we have chosen to fix most internal parameters with defaults values, which  
408 have been tested to be adapted for medium size datasets as provided in the example (47 K SNP, 760  
409 training lines), while maintaining computing time into reasonable limits for desktop computers. It is  
410 therefore easy to use, especially for beginners, and of course parameters can be modified quite easily in  
411 the source code to adapt larger datasets.

412 In our highly unbalanced breeder's dataset, when discarding control lines which were regularly replicated  
413 over years, the average number of environment per studied lines is 10.4, with two replicates by  
414 environment (site x year). This led to an estimate of broad sense heritability of 0.76 and therefore a  
415 theoretical upward limit of prediction accuracy of 0.872. When using random cross validation and the  
416 whole set of 47,839 markers, the achieved predictive ability is 0.525, which would correspond to an  
417 accuracy of 0.603 according to formula in [21]. However we do not fully trust in this formula, since  
418 heritabilities are often poorly estimated. We do prefer keeping predictive ability as a criteria for  
419 comparing models and strategies.

420 Our results compare with previously reported predictive ability estimated through random cross-  
421 validation, for example 0.36-0.53 [40] and 0.32-0.59 [41] for grain yield in bread wheat with training  
422 population of a few hundreds lines, and up to 0.65 with a training set of 2325 elite European wheat lines

423 [42]. The use of random cross validation seems to be justified, since no clear-cut structure appears in the  
424 set of lines. In particular, lines put into trial in a given year are not more related with each other than with  
425 lines put into trails another year. Then the predictive ability obtained in random cross-validation should  
426 be valid for any other set of lines showing a similar degree of relatedness than within the training set.

427

## 428 **Effect of marker density and training population size**

429 Although GS theory has been elaborated to cope with the over parameterization problem (number of  
430 markers  $\gg$  number of observations), it empirically appears that adding more markers than needed does  
431 not improve predictive ability. This was already observed in many reports. Among other, a figure similar  
432 to our Figure 3 can be found in [43]. In this empirical study in maize, GS accuracy reach a plateau with  
433 7000 randomly selected markers in a “natural” population, and with only 2000 markers in biparental  
434 populations. In a recent simulation study with high density coverage, the same authors even stated that  
435 the accuracy obtained using all SNPs can be easily achieved using only 0.5 to 1.0% of all markers [44].  
436 This clearly illustrates that, once every QTL information is captured by one marker in LD, adding more  
437 markers is useless. This of course relates to the average linkage disequilibrium between adjacent markers.  
438 In our study, the material is made of hundreds of related families, each of small size, and the plateau is  
439 reached around 2000-5000 random markers, a value close to that observed for maize natural population,  
440 while [45] reported that 256 markers were enough to achieve maximum accuracy in wheat bi-parental  
441 populations. Similarly, in a population of 235 soybean varieties, predictive ability did not change much,  
442 whatever the number of markers (ranging 200-5200) and the way they were selected, either at random or  
443 one per haplotype block [46]. In a study of wheat breeding lines [47] found a plateau for predictive ability  
444 of yield around 2000 random markers as in the present study. Avoiding selection of markers pairs which  
445 are in high LD (LD-pruning) further improves predictive ability compare to random sampling. This was

446 reported in a soybean study, in which the authors found a 4% increase of prediction accuracy when  
447 selecting markers from haplotype blocks rather than random or equidistant.

448 Selecting markers that are significantly associated with QTLs can achieve higher predictive ability than  
449 randomly selected markers, and surprisingly even higher predictive ability than using all markers.  
450 However, it is clear from Fig 4 that selecting markers from their Pvalue in GWAS carried out on the  
451 whole population; i.e. including validation lines, does led to overfitting and this approach must be  
452 avoided and cannot be used in practice. This was reported many times. For example, in a wheat study  
453 [47] selected markers by GWAS on the training set only, as we did also in Fig 4. However, they observed  
454 a gain in predictive ability of up to 0.2, particularly for very small number of markers (<100), while we  
455 only had small improvement of about 0.01 with a maximum gain for 2000 markers. Nearly similar results  
456 were reported by [48].

457 In theory, the prediction accuracy is positively related to the training population size, as established by  
458 simulation studies [49-51]. This was confirmed in many empirical studies such as those already  
459 mentioned [42, 46, 47]. As expected from the theory, optimizing a subset of training lines gave higher  
460 PA than random selection. This was confirmed in empirical studies [23] then [52-53] in the case of  
461 population structure. Their optimization algorithm uses a simulated annealing approach. Other  
462 optimization methods have been proposed, such as a genetic algorithm [54] and also led to higher PA for  
463 a given training size.

464

## 465 **Effect of prediction method**

466 Prediction methods have been classified into parametric and non-parametric (or semi-parametric)  
467 methods, and parametric methods sometimes split into penalized approach and Bayesian approach (for

468 reviews see [17] and [55-57]). In our study, most methods gave close values of predictive abilities,  
469 ranging 0.475 -0.543, with the noticeable exception of SVM, which worked with up to 5000 markers  
470 (data not shown), but failed with the 47 K markers. Some methods seem to give poorer results, such as  
471 LASSO and EN (elastic net) from the glmnet library, and also BRNN. In this latter case it may be due to  
472 insufficient computer resources, who led us to use restrictive parameters (e.g. number of iterations,  
473 number of neurone layers...), thereby limiting performances of this highly demanding method. In any  
474 case predictive ability is not related to computing time, with the less demanding GBLUP ranking the  
475 fifth best method.

476 Although there is no clear-cut separation between parametric vs non-parametric methods, nor between  
477 penalized vs Bayesian approach, it seems that methods that are supposed to better capture non additive  
478 and/or non-linear effects such as EGBLUP or RKHS gave higher PA, as already reported [33,42,48,56].  
479 Low difference in predictive ability has already been reported by [39] who analysed three wheat  
480 populations for GEBV using 10 statistical models, with RKHS being the most accurate and Support  
481 Vector Machine the least accurate methods, as we also found in our study.

482 In a simulation study, [58] showed that with 121 markers with additive effects, RKHS and radial basis  
483 neural network (close to our BRNN option) clearly out passed the linear Bayesian LASSO, but it was no  
484 longer the case when adding the 7260 interactions between markers. The authors stated that “adding non-  
485 signal predictors can adversely affect the predictive accuracy of the non-linear regression models”. Other  
486 studies have shown the interest of machine learning methods for genomic prediction [59-60]. In our  
487 study, this was not the case for RKHS, but for SVM and BRNN. It may have been better to choose the  
488 set of LD-pruning selected markers to optimize predictive ability of these methods.

489 But perhaps more important than the predictive ability is to know whether the different methods give  
490 similar values or at least similar rankings of GEBV for candidates. Indeed correlations between predicted



491 GEBV with the 15 methods range from 0.85 to nearly 1. The highest values being observed between  
492 linear parametric methods, whatever based on penalized regression or Bayesian approaches. Machine  
493 learning methods such as SVM and BRNN are least related to others, except with MKRKHS. Given the  
494 close values of both predictive abilities and GEBV estimates among methods, it seems reasonable to  
495 keep the historical GBLUP as a reference method, for its simplicity and fastness, at least for polygenic  
496 traits such as grain yield chosen to illustrate this study.

497

## 498 **Conclusion**

499 The R pipeline we have developed is based on publically available libraries and therefore offers a full  
500 freedom to operate. It is easy to handle and allows a wide range of options for missing data imputation,  
501 marker or training set selection and prediction methods. Its parameterization was fixed for medium sized  
502 datasets to make it easy to use for beginners or teaching. Applying this tool with defaults parameters to  
503 a set of elite breeding lines with historical data from yield trials allowed us to obtain similar results to  
504 those reported on other wheat populations. The options for subsampling markers and/or training set  
505 enabled us to illustrate theoretical expectations (e.g. [61]). The predictive abilities obtained on this  
506 population of limited size are encouraging for the success of genomic selection in applied wheat breeding.  
507 Of course, BWGS does not deal with all challenges. It is now admitted that most methods give reasonably  
508 high accuracy, although recent studies claim that prediction accuracy could be improved with new  
509 alliances to share data across breeding programmes [62]. Rather, the challenges for future wheat breeding  
510 are 1) efficient implementation in real breeding schemes and/or adapting selection schemes with step(s)  
511 of GS (e.g.[63-64]), 2) prediction of GxE (e.g. [65]for review) and 3) incorporating multitrait selection  
512 (e.g. [66]).

513 Future developments of BWGS are ongoing to address these challenges, particularly multitrait selection.

514 The source code of BWGS R functions as well as example files and notice are available on  
515 <https://forgemia.inra.fr/umr-gdec/bwgs>

516

517

518 Acknowledgements

519 This work was supported by the BreedWheat project thanks to funding from the French Government  
520 managed by the National Research Agency (ANR) in the framework of Investments for the Future (ANR-  
521 10-BTBR-03), France AgriMer and the French Fund to support Plant Breeding (FSOV).

522

523 References

- 524 1. Lande R, Thompson R (1990) Efficiency of Marker-Assisted Selection in the Improvement of  
525 Quantitative Traits. *Genetics* 124:743-756
- 526 2. Hospital F, Moreau L, Lacoudre F, Charcosset A, Gallais A (1997) More on the efficiency of  
527 marker-assisted selection. *Theoretical and Applied Genetics* 95:1181-1189
- 528 3. Bernardo R, Moreau L, Charcosset A. Number and fitness of selected individuals in marker-  
529 assisted and phenotypic recurrent selection. *Crop Sci* 2006;46: 1972-1980.
- 530 4. Moreau L, Charcosset A, Hospital F, Gallais A (1998) Marker-assisted selection efficiency in  
531 populations of finite size. *Genetics* 148:1353-1365
- 532 5. Whittaker, J.C., R., Thompson, M.C. Denham. 2000. Marker-assisted selection using ridge  
533 regression. *Genet. Res.* 75:249-252.
- 534 6. Meuwissen THE, Hayes B, Goddard ME (2001) Prediction of total genetic value using genome-  
535 wide dense marker maps; *Genetics* 157:1819-1829
- 536 7. Goddard ME, Hayes BJ (2007) Genomic selection. *J Anim Breed Genet* 124:323-330.
- 537 8. Schaeffer, L. R. (2006) Strategy for applying genome-wide selection in dairy cattle. *Journal of*  
538 *Animal Breeding and Genetics* 123: 218-223 DOI: 10.1111/j.1439-0388.2006.00595.x
- 539 9. Bernardo R, Yu JM. Prospects for genomewide selection for quantitative traits in maize. *Crop*  
540 *Sci* 2007;47:1082-1090.
- 541 10. Heffner EL, Sorrells ME, Jannink JL (2009) Genomic Selection for Crop Improvement. *Crop*  
542 *Science* 49:1-12
- 543 11. Crossa J., de los Campos G., Perez P., Gianola D., Burgueño J., Araus J.L., Makumbi D., Singh  
544 R.P., Dreisigacker S., Yan J, Arief V., Banziger M. and Braun H.J. 2010. Prediction of Genetic  
545 Values of Quantitative Traits in Plant Breeding Using Pedigree and Molecular Markers. *Genetics*  
546 186: 713-724

- 547 12. Jannink J. L.; Lorenz A. J.; Iwata H. (2010) Genomic selection in plant breeding: from theory to  
548 practice. *Briefings in Functional Genomics & Proteomics* 9: 166-177
- 549 13. Iwata H.; Jannink J. L. (2011) Accuracy of genomic selection prediction in barley breeding  
550 programs: a simulation study based on the real single nucleotide polymorphism data of barley  
551 breeding lines. *Crop Sci* 2011;51: 1915-1927
- 552 14. Lorenz AJ, Chao S, Asoro FG, Heffner EL, Hayashi T, Iwata H, Smith KP, Sorrells MK and  
553 Jannink J L (2011) Genomic selection in plant breeding: knowledge and prospects *Adv Agron*  
554 110, 77–123
- 555 15. Poland, J., Endelman, J.B., Dawson, J., Rutkoski, J.E., Wu, S., Manès, Y., Dreisigacker, S.,  
556 Crossa, J., Sanchez-Villeda, H., Sorrells, M.E., & Jannink, J. (2012). Genomic Selection in Wheat  
557 Breeding using Genotyping-by-Sequencing. *The Plant Genome* 2012;5:103–113. doi:  
558 10.3835/plantgenome2012.06.0006
- 559 16. Scheet, P and Stephens, M (2006). A fast and flexible statistical model for large-scale population  
560 genotype data: applications to inferring missing genotypes and haplotypic phase. *Am. J. Hum.*  
561 *Genet.* 2006; 78:629–644
- 562 17. Desta, Z.A., Ortiz, R. (2014) Genomic selection: genome-wide prediction in plant improvement.  
563 *Trends Plant Sci.* 2014 Sep;19(9):592-601. doi: 10.1016/j.tplants.2014.05.006. Epub 2014 Jun  
564 23.
- 565 18. R Development Core Team, 2011 R: A Language and Environment for Statistical Computing.  
566 R Foundation for Statistical Computing, Vienna. <http://www.R-project.org>
- 567 19. Pérez P, de los Campos G. Genome-Wide Regression and Prediction with the BGLR Statistical Package.  
568 *Genetics.* 2014;198(2):483-495. doi:10.1534/genetics.114.164442.
- 569 20. Endelman J.B. (2011) Ridge Regression and Other Kernels for Genomic Selection with R  
570 Package rrBLUP. *The Plant Genome* 4:250–255

- 571 21. Estagvirou SBO, Ogutu JO, Schulz-Streek T, Knaak C, Ouzunova M, Gordillo A, Piepho AP  
572 (2013) Evaluation of approaches for estimating the accuracy of genomic prediction in plant  
573 breeding. BMC Genomics 12:860 <http://www.biomedcentral.com/1471-2164/14/860>
- 574 22. Browning BL, Browning SR. Genotype Imputation with Millions of Reference Samples.  
575 American Journal of Human Genetics 2016;98(1), 116–126. [doi 10.1016/j.ajhg.2015.11.020](https://doi.org/10.1016/j.ajhg.2015.11.020)
- 576 23. Rincent, R., D. Laloe, S. Nicolas, T. Altmann, D. Brunel, P. Revilla, V., M Rodriguez J.  
577 Moreno-Gonzalez, A. Melchinger, E. Bauer, C.C. Schoen, N. Meyer, C. Giauffret, C.  
578 Bauland, P. Jamin, J. Laborde, H. Monod, P. Flament, A. Charcosset, and L. Moreau. 2012.  
579 Maximizing the reliability of genomic selection by optimizing the calibration set of reference  
580 individuals: Comparison of methods in two diverse groups of maize inbreds (*Zea may L.*)  
581 Genetics 192:715–728 doi:10.1534/genetics.112.141473
- 582 24. De los Campos, G., Hickey, J. M., Pong-Wong, R., Daetwyler, H. D., & Calus, M. P. L. (2013).  
583 Whole-Genome Regression and Prediction Methods Applied to Plant and Animal Breeding.  
584 Genetics, 193(2), 327–345. <http://doi.org/10.1534/genetics.112.143313>
- 585 25. Jiang, Y., & Reif, J. C. (2015). Modeling Epistasis in Genomic Selection. Genetics, 201(2), 759–  
586 768. <http://doi.org/10.1534/genetics.115.177907>
- 587 26. Friedman, J., Hastie, T. and Tibshirani, R. (2008) Regularization Paths for Generalized Linear  
588 Models via Coordinate Descent, <https://web.stanford.edu/~hastie/Papers/glmnet.pdf>. Journal of  
589 Statistical Software, Vol. 33(1), 1-22 Feb 2010
- 590 27. Zou H, Hastie T. Regularization and variable selection via the elastic net. J. Royal. Stat. Soc. B.  
591 2005;67(2):301–320. [
- 592 28. Park, T., Casella, G. (2008). The bayesian lasso. Journal of the American Statistical Association.  
593 2008;103:681–686. 103.

- 594 29. Habier, DRL Fernando RL, Kizilkaya K and Garrick DJ(2011) Extension of the bayesian alphabet  
595 for genomic selection. BMC Bioinformatics2011. 12:186.
- 596 30. Gianola, D., & van Kaam, J. B. C. H. M. (2008). Reproducing Kernel Hilbert Spaces Regression  
597 Methods for Genomic Assisted Prediction of Quantitative Traits. Genetics, 178(4), 2289–2303.  
598 <http://doi.org/10.1534/genetics.107.084285>
- 599 31. De los Campos, G., D. Gianola, G. J. M., Rosa, K. A., Weigel, and J. Crossa. 2010. Semi-  
600 parametric genomic-enabled prediction of genetic values using reproducing kernel Hilbert  
601 spaces methods. Genetics Research92 :295-308
- 602 32. Breiman L. "Random Forests". Machine Learning 2001;45 (1): 5–32.
- 603 33. Gianola D, Okut H, Weigel KA, Rosa GJ. Predicting complex quantitative traits with Bayesian  
604 neural networks: a case study with Jersey cows and wheat. BMC Genetics. 2011;12:87.  
605 doi:10.1186/1471-2156-12-87.
- 606 34. Oury, F.X., Heumez, E., Rolland, B., Auzanneau, J., Bérard, P., Brancourt-Hulmel, M., Charrier,  
607 X., Chiron, H., Depatureaux, C., Falchetto, L., et al (2015) Winter wheat (*Triticum aestivum* L)  
608 phenotypic data from the multiannual, multilocal field trials of the INRA Small Grain Cereals  
609 Network. doi: 10.15454/1.4489666216568333E12
- 610 35. Rimbart H, Darrier B, Navarro J, et al. High throughput SNP discovery and genotyping in  
611 hexaploid wheat. Zhang A, ed. PLoS ONE. 2018;13(1):e0186329.  
612 doi:10.1371/journal.pone.0186329.
- 613 36. Zhou Y, Vales MI, Wang A, Zhang Z. Systematic bias of correlation coefficient may explain  
614 negative accuracy of genomic prediction. Brief Bioinform. 2016:bbw065  
615 doi:10.1093/bib/bbw064
- 616 37. Endelman, J.R., and J.L. Janninck. Shrinkage estimation of the realized relationship matrix. G3:  
617 Genes, Genomes, Genetics 2012, 2:1405-1413 doi: 10.1534/g3.112.004259

618

- 619 38. Wimmer, V., Albrecht, T., Auinger, J.J., Schön; C.C. 2012. Synbreed: a framework for the  
620 analysis of genomic prediction data using R, *Bioinformatics*, 28: 2086–2087
- 621 39. Ma, C., Cheng, Q., Qiu Z., Song, J. (2017). Package ‘G2P’ Genomic selection Prediction and  
622 Evaluation <https://github.com/cma2015/G2P>
- 623 40. Heslot, N., Yang, H.P., Sorrells M.E., Jannink, J.L. 2012. Genomic Selection in Plant Breeding:  
624 A Comparison of Models. *Crop Sci.* 52:146–160
- 625 41. Michel, S., Ametz, C., Gungor, H., Epure, D., Grausgruber, H., Löschenberger, F., & Buerstmayr,  
626 H. (2016). Genomic selection across multiple breeding cycles in applied bread wheat breeding.  
627 TAG. *Theoretical and Applied Genetics. Theoretische Und Angewandte Genetik*, 129, 1179–  
628 1189. <http://doi.org/10.1007/s00122-016-2694-2>
- 629 42. He, S., Schulthess, A.W., Mirdita, V., Zhao, Y., Korzun, V., Bothe, R., Jochen,E. and C. Reif  
630 (2016) Genomic selection in a commercial winter wheat populational. *Theor Appl Genet* (2016)  
631 129: 641. <https://doi.org/10.1007/s00122-015-2655-1>
- 632 43. Liu, X., Wang, H., Wang, H., Guo, Z., Xu, X., Liu, J., Wang, S., Li, W.X., Zou, C., Prasanna,  
633 B.M., Olsen, M.S., Huang, C., Xu, Y. (2018), Factors affecting genomic selection revealed by  
634 empirical evidence in maize, *The Crop Journal*. <https://doi.org/10.1016/j.cj>.
- 635 44. Ly, C., Toghiani, S., Ling, A., Aggrey, S.E.3,4, Rekaya, R. (2018). High density marker panels,  
636 SNPs prioritizing and accuracy of genomic selection. *BMC Genet.* 2018 Jan 5;19(1):4. doi:  
637 10.1186/s12863-017-0595-2.
- 638 45. Heffner E.L., Jannink J-L. Sorrells M.E (2011) Genomic Selection Accuracy using Multifamily  
639 Prediction Models in a Wheat Breeding Program. *The Plant Genome* 4:65–75.

- 640 46. Ma, Y., Reif, J.C., Jiang, Y. et al. Potential of marker selection to increase prediction accuracy of  
641 genomic selection in soybean (*Glycine max* L.) Mol Breeding (2016) 36: 113.  
642 <https://doi.org/10.1007/s11032-016-0504-9>
- 643 47. Cericola C, Jahoor A, Orabi J, Andersen JR, Janss LL, Jensen J. Optimizing training population  
644 size and genotyping strategy for genomic prediction using association study results and pedigree  
645 information. A case study in advanced wheat breeding lines. PLoS ONE (2017);12 (1) e0169606.  
646 Doi 10.371/journal.pone.0169606
- 647 48. Schulz-Streeck, T., Ogutu, J. O., & Piepho, H.-P. (2011). Pre-selection of markers for genomic  
648 selection. BMC Proceedings, 5(Suppl 3), S12. <http://doi.org/10.1186/1753-6561-5-S3-S12>
- 649 49. Daetwyler, H.D., B. Villanueva, and J.A. Woolliams. 2008. Accuracy of predicting the genetic  
650 risk of disease using a genome-wide approach. PLoS ONE 3:e3395.  
651 doi:10.1371/journal.pone.0003395
- 652 50. Daetwyler, H.D., R. Pong-Wong, B. Villanueva, and J.A. Woolliams. 2010. The impact of genetic  
653 architecture on genome-wide evaluation methods. Genetics 185:1021–1031.  
654 doi:10.1534/genetics.110.116855
- 655 51. Daetwyler, H.D., Calus, M.P.L., Poing-Wong, R., De Los Campos, G., Hickey, J.M. 2013.  
656 Genomic Prediction in Animals and Plants: Simulation of Data, Validation, Reporting, and  
657 Benchmarking. Genetics 193: 347-365
- 658 52. Isidro, J., Jannink, JL., Akdemir, D., Poland J., Heslot, N., Sorrels, M.E. (2015) Training set  
659 optimization under population structure in genomic selection. Theor Appl Genet (2015) 128: 145.  
660 <https://doi.org/10.1007/s00122-014-2418-4>
- 661 53. Rincent, R., Charcosset, A. & Moreau, L. Predicting genomic selection efficiency to optimize  
662 calibration set and to assess prediction accuracy in highly structured populations. Theor Appl  
663 Genet (130: 2231. <https://doi.org/10.1007/s00122-017-2956-7>



- 664 54. Akdemir D, Sanchez JI, Janninck JL.(2015) Optimization of genomic selection training  
665 populations with a genetic algorithm. *Genetics Selection Evolution* 2015;47: 38. Doi  
666 10.1186/s12711-015-0116-6
- 667 55. Song, J., Carver, B.F., Powers, C, Yan, L., Klapste, J., El-Kassaby, Y.A., Chen, C. (2017)  
668 Practical application of genomic selection in a doubled-haploid winter wheat breeding  
669 programme. *Mol Breeding* (2017) 37: 117. <https://doi.org/10.1007/s11032-017-0715-8>
- 670 56. Wang, X., Xu, Y., Hu, Z., Xu, C. (2018) , Genomic selection methods for crop improvement:  
671 Current status and prospects. *The Crop Journal* (2018) [https://doi.org/10.1016:j.cj/2018.03.001](https://doi.org/10.1016/j.cj/2018.03.001)
- 672 57. Wang, D., El-Basyoni, I.S., Baenziger, P.S. Crossa, J., Eskridge, K.M., Dweikat I. (2012)  
673 Prediction of genetic values of quantitative traits with epistatic effects in plant breeding  
674 populations. *Heredity*, 109 (2012), pp. 313-319
- 675 58. González-Camacho, J. M., de los Campos, G., Pérez, P., Gianola, D., Cairns, J. E., Mahuku, G.,  
676 Crossa, J. (2012). Genome-enabled prediction of genetic values using radial basis function neural  
677 networks. *TAG. Theoretical and Applied Genetics.*, 125(4), 759–771.  
678 <http://doi.org/10.1007/s00122-012-1868-9>
- 679 59. Li B, Zhang N, Wang Y-G, George AW,Reverter A and Li Y (2018) GenomicPrediction of  
680 Breeding Values Using aSubset of SNPs Identified by ThreeMachine Learning Methods.*Front.*  
681 *Genet.* 9:237.doi: 10.3389/fgene.2018.00237
- 682 60. Ma, W., Qiu, Z., Song, J., Li, J., , Cheng, Q., Zhai, J., Ma C(2018) Deep convolutional neural  
683 network approach for predicting phenotypes from genotypes*Planta* (2018) 248: 1307.  
684 <https://doi.org/10.1007/s00425-018-2976-9>
- 685 61. Kang,H., Zhou, L., Liu, J. (2017) Statistical considerations for genomic selection. *Front. Agr. Sci.*  
686 *Eng.* 2017, 4(3):268-278.

- 687 62. Spindel, J.E., Mc Couch, S.R. (2016) When more is better: how data sharing would accelerate  
688 genomic selection of crop plants. New Phytologist (2016) 212:814-826
- 689 63. Heslot, N., Jannink, J.L., Sorrells M.E. (2015). Perspectives for Genomic Selection. Application  
690 and Research in Plants. Crop Sci. 55:1-12
- 691 64. Bassi FM, Bentley AR, CharmetG, Ortiz R, Crossa J. Breeding schemes for the implementation  
692 of genomic selection in wheat (*Triticum* spp.). Plant Science 2016;242:23-36.  
693 Doi10.1016/j.plantsci.2015.08.021
- 694 65. J. Crossa, P. Pérez-Rodríguez, J. Cuevas, O. Montesinos-López, D. Jarquín, G. delos Campos, J.  
695 Burgueño, J.M. Camacho-González, S. Pérez-Elizalde, Y. Beyene, S. Dreisigacker, R. Singh, X.  
696 Zhang, M. Gowda, M. Roorkiwal, J. Rutkoski, R. Varshney. Genomic selection in plant breeding:  
697 methods, models, and perspectives. Trends Plant Sci., 22 (2017), pp. 961-975,  
698 10.1016/j.tplants.2017.08.011
- 699 66. Michel, S., Kummer, C., Gallee, M., Hellinger, J., Ametz, C., Akgöl, B., Epure, D.,  
700 Loschenberger, F., Buerstmayr, H. (2018). Improving the baking quality of bread wheat by  
701 genomic selection in early generations. TAG. Theor Appl Gen. 131(2), 477–493.  
702 <http://doi.org/10.1007/s00122-017-2998-x>  
703

705 **Tables and figures**

706 **Fig 1: Workflow of the two main functions of BWGS.** bwgs.cv does model cross-validation on a  
707 training set and bwgs.predict does model calibration on a training set and GEBV prediction of a target  
708 set of genotypes. MAF = Minor Allele Frequency, maxNA = maximum % of marker missing data

709 Fig 2: Histogram (a), heat map (b) and PCA plot (c) of the scaled coefficient of coancestry between the  
710 760 breeding. Yx represents the year of first evaluation of a given line.

711 Fig 3: Predictive ability of GBLUP as a function of % of randomly generated missing data, with two  
712 imputation methods 1) mean allele frequency or 2) expectation-maximization (EM in A.mat function of  
713 rrBLUP library)

714 Fig 4: Predictive ability as a function of marker number selected either 1) randomly, 2) by GWAS in  
715 the training set within each replicate\* fold, 3) by GWAS on the entire population and 4) by LD-  
716 pruning.

717 Fig 5: Distribution of predictive ability according to the size of randomly selected training population  
718 and relative computing time.

719 Fig 6: Predictive ability as a function of training population size selected either 1° randomly or 2) by  
720 the CD-mean optimization algorithm of [23]

721 Fig 7: Distribution of predictive ability of the 100 replicates for each of the 14 methods which worked  
722 correctly, average is in red and relative computing time in green line.

723 Fig 8: Histograms, bi-plot and correlation values among predicted GEBV obtained with 14 methods.

724

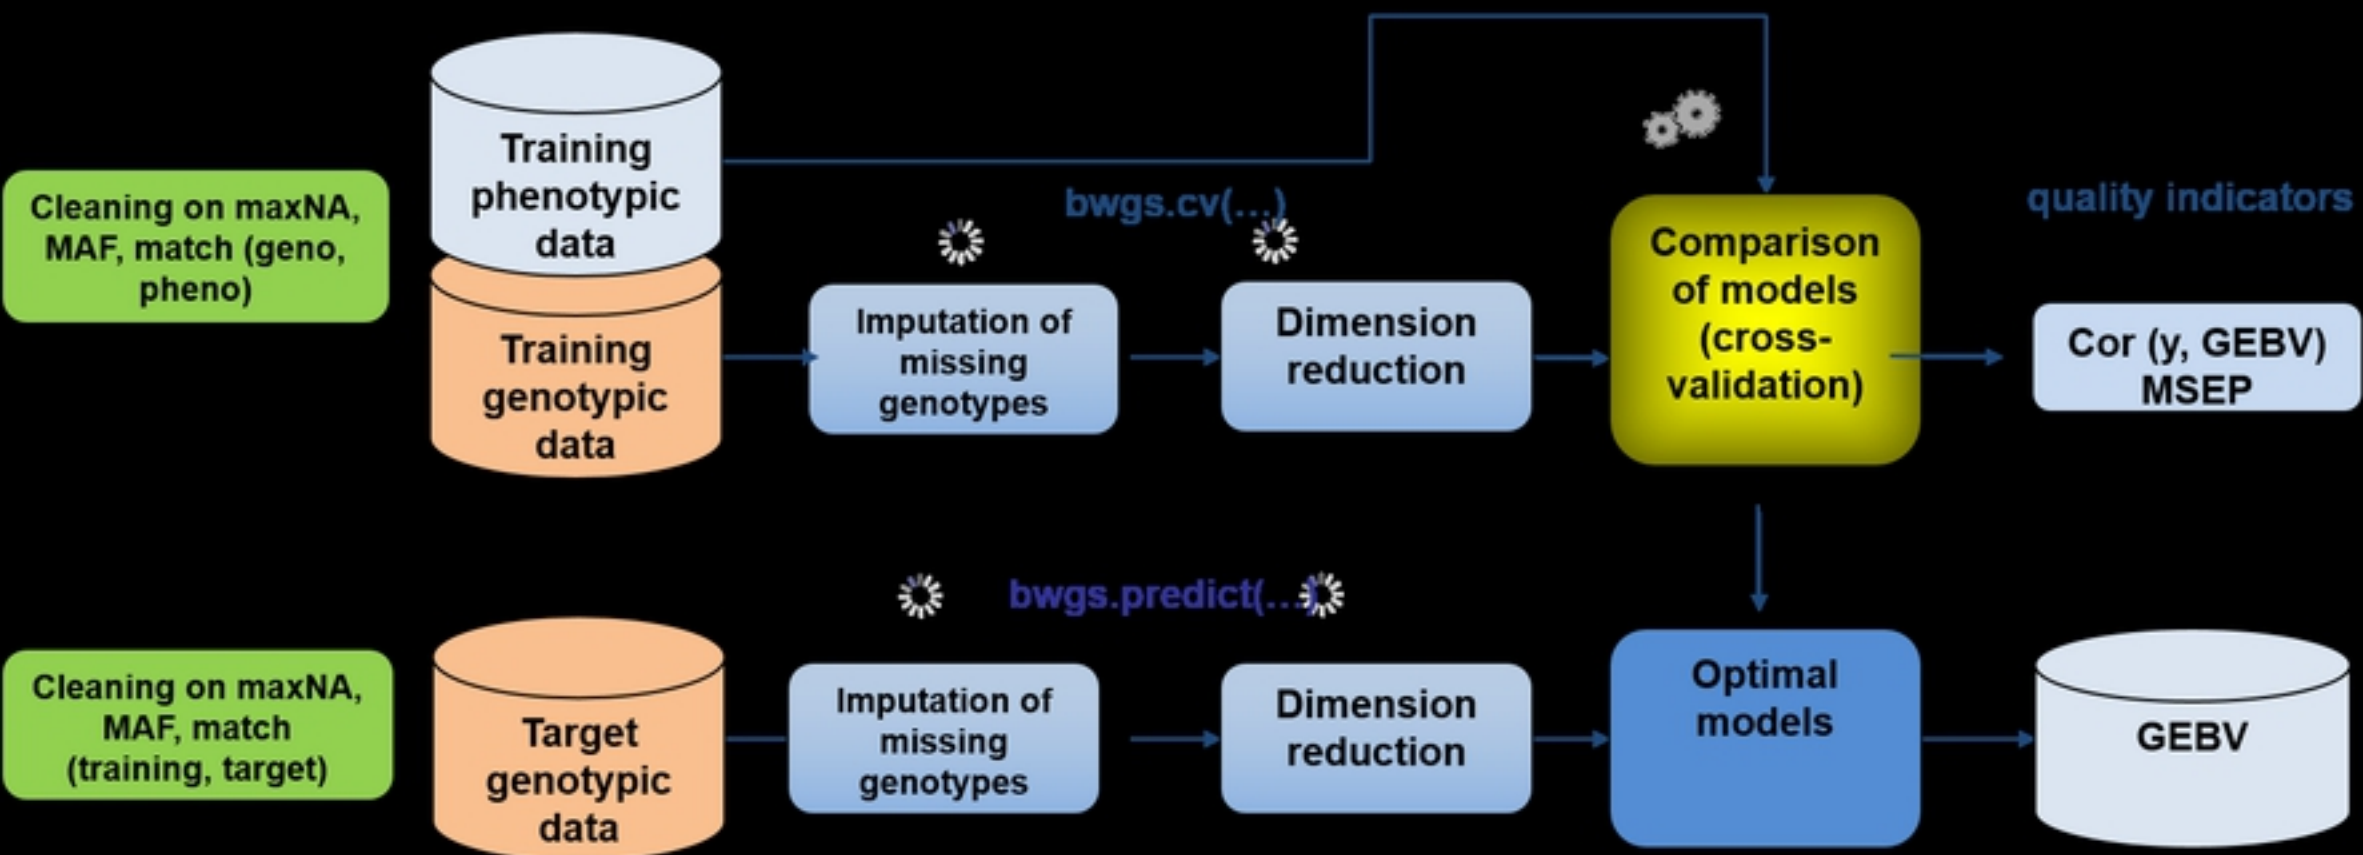

Figure

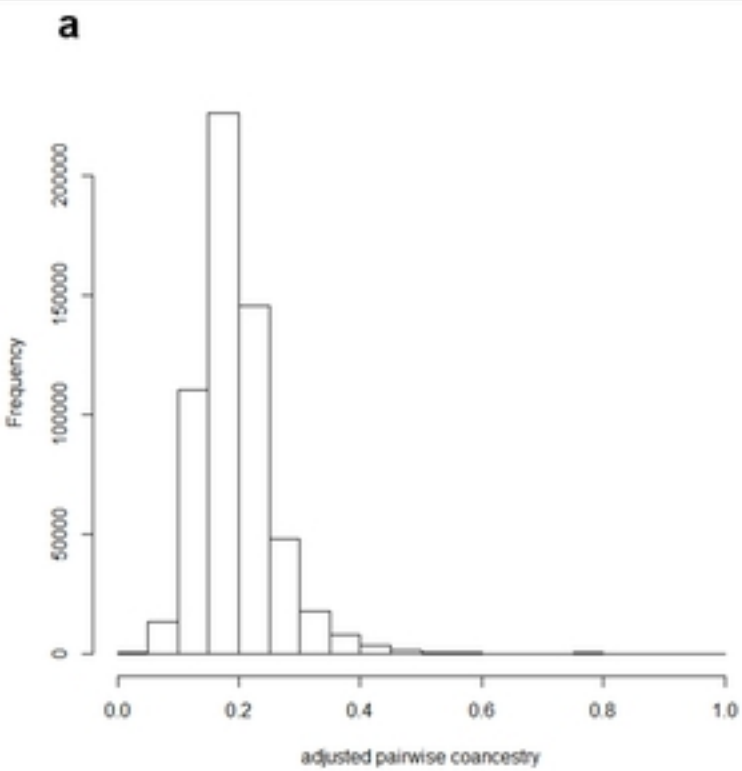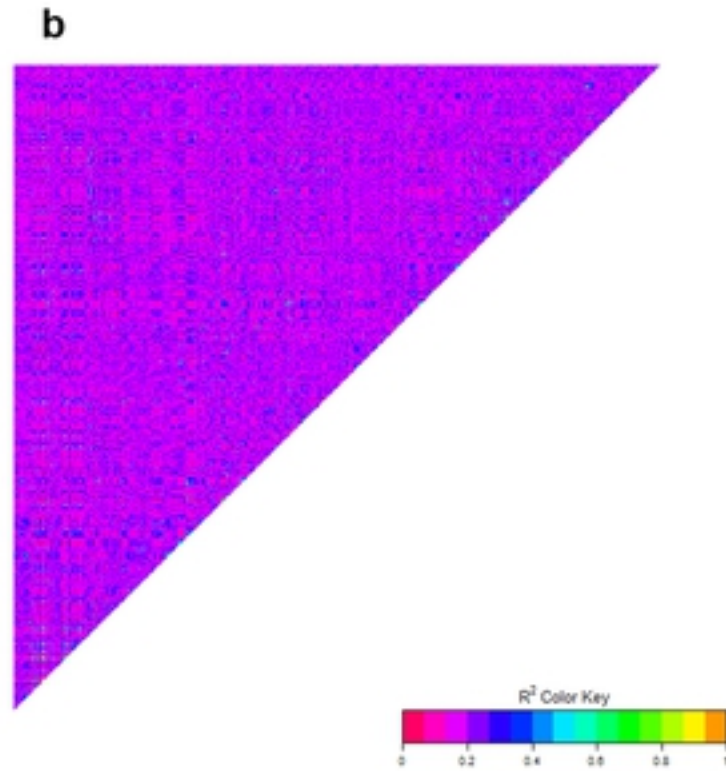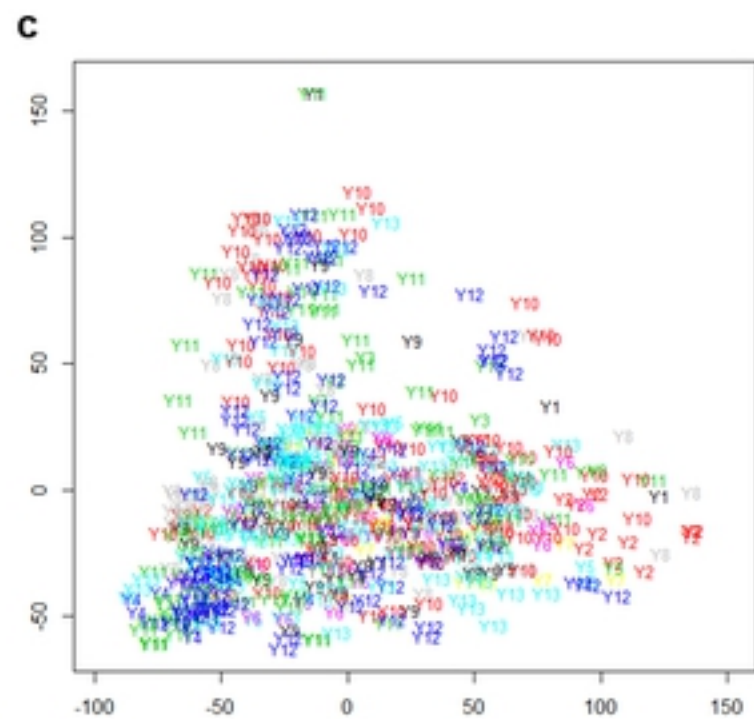

Figure

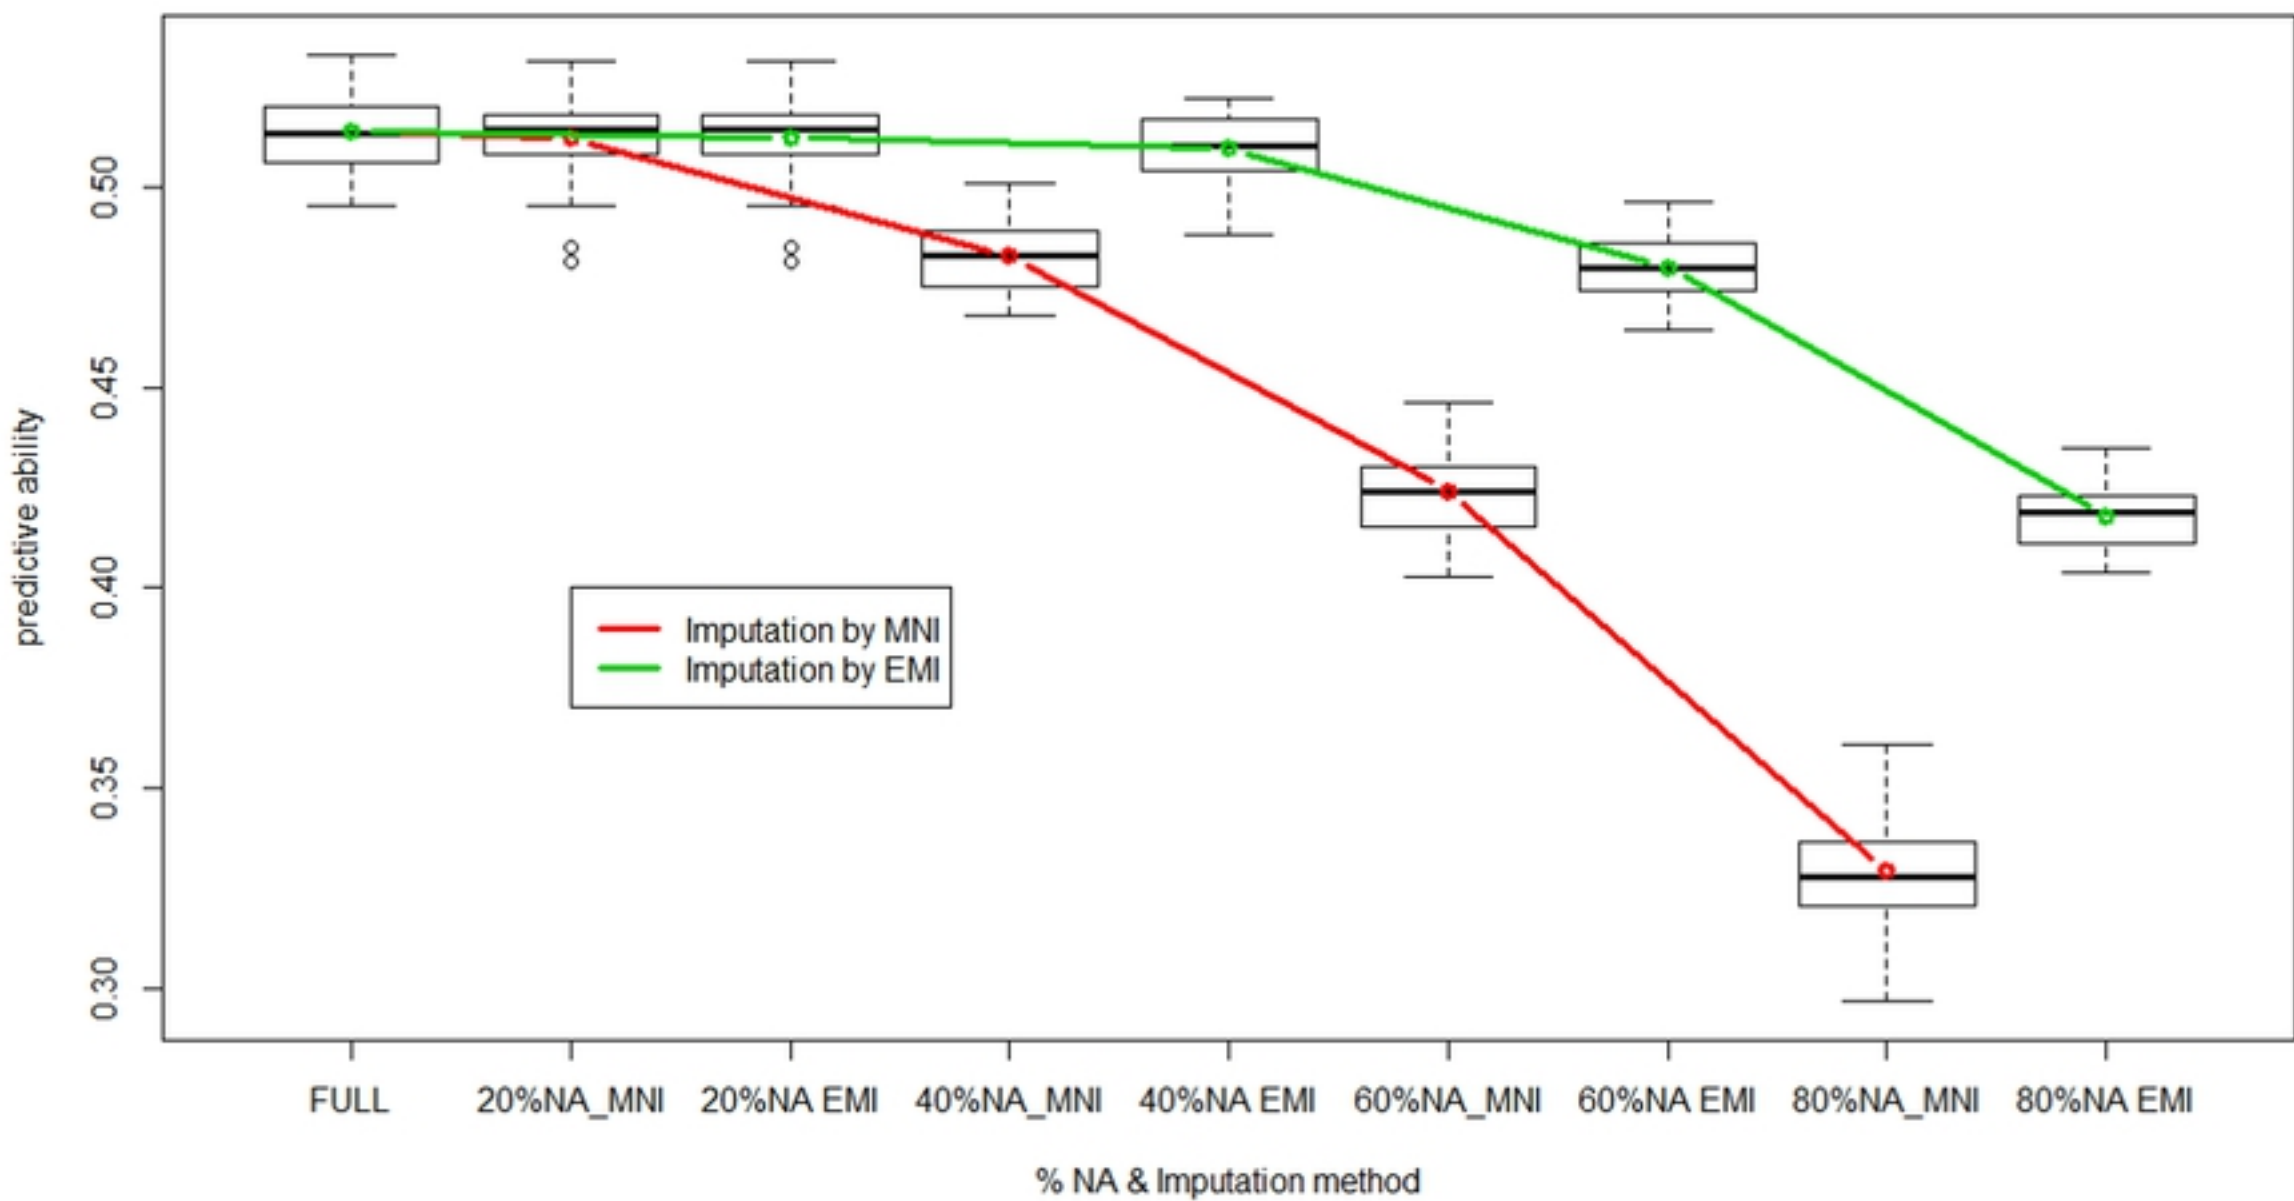

Figure

### Effect of marker selection

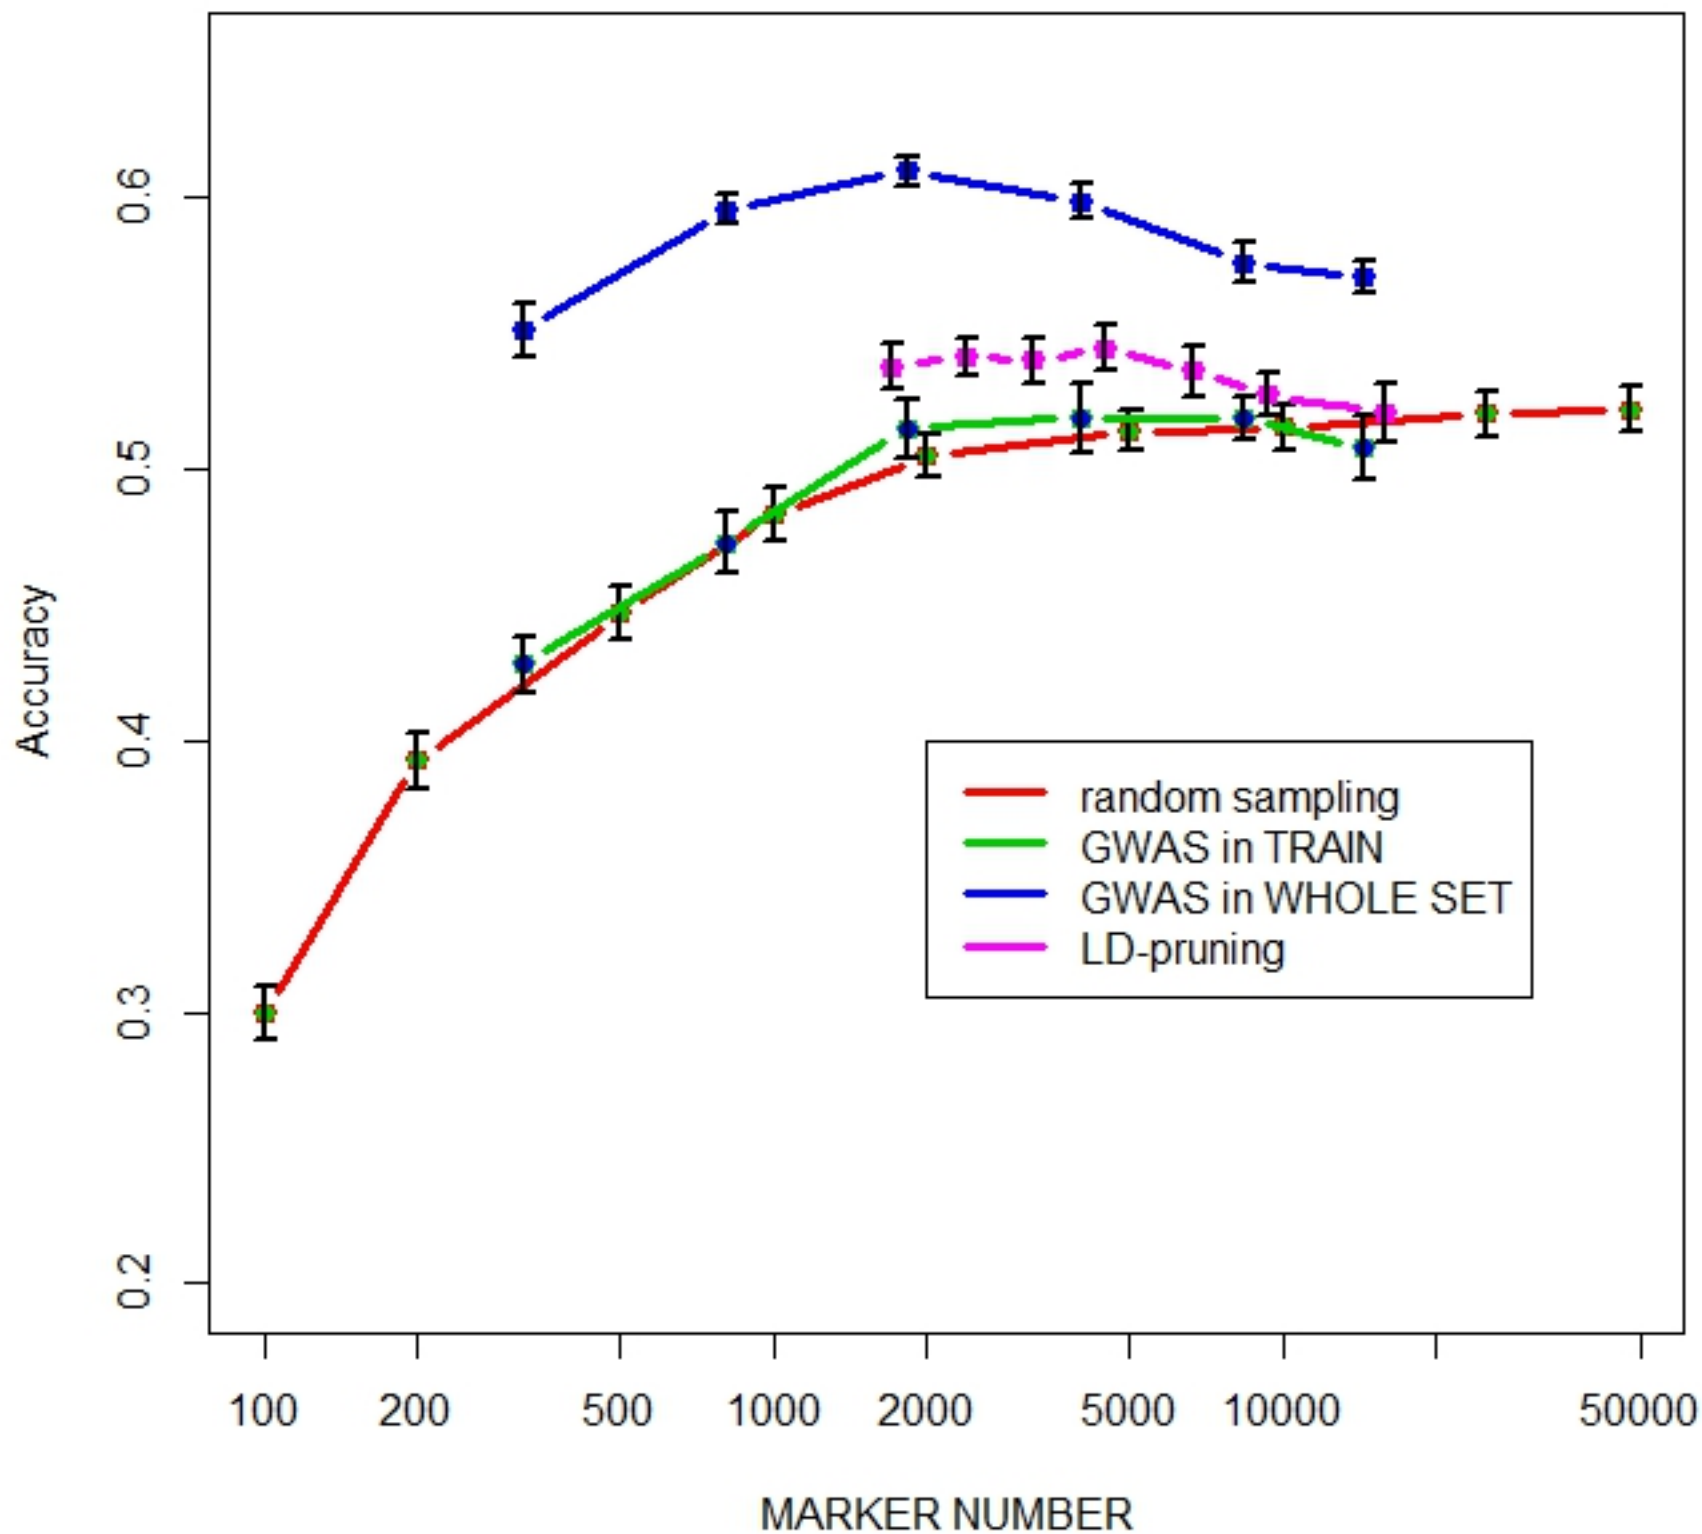

Figure

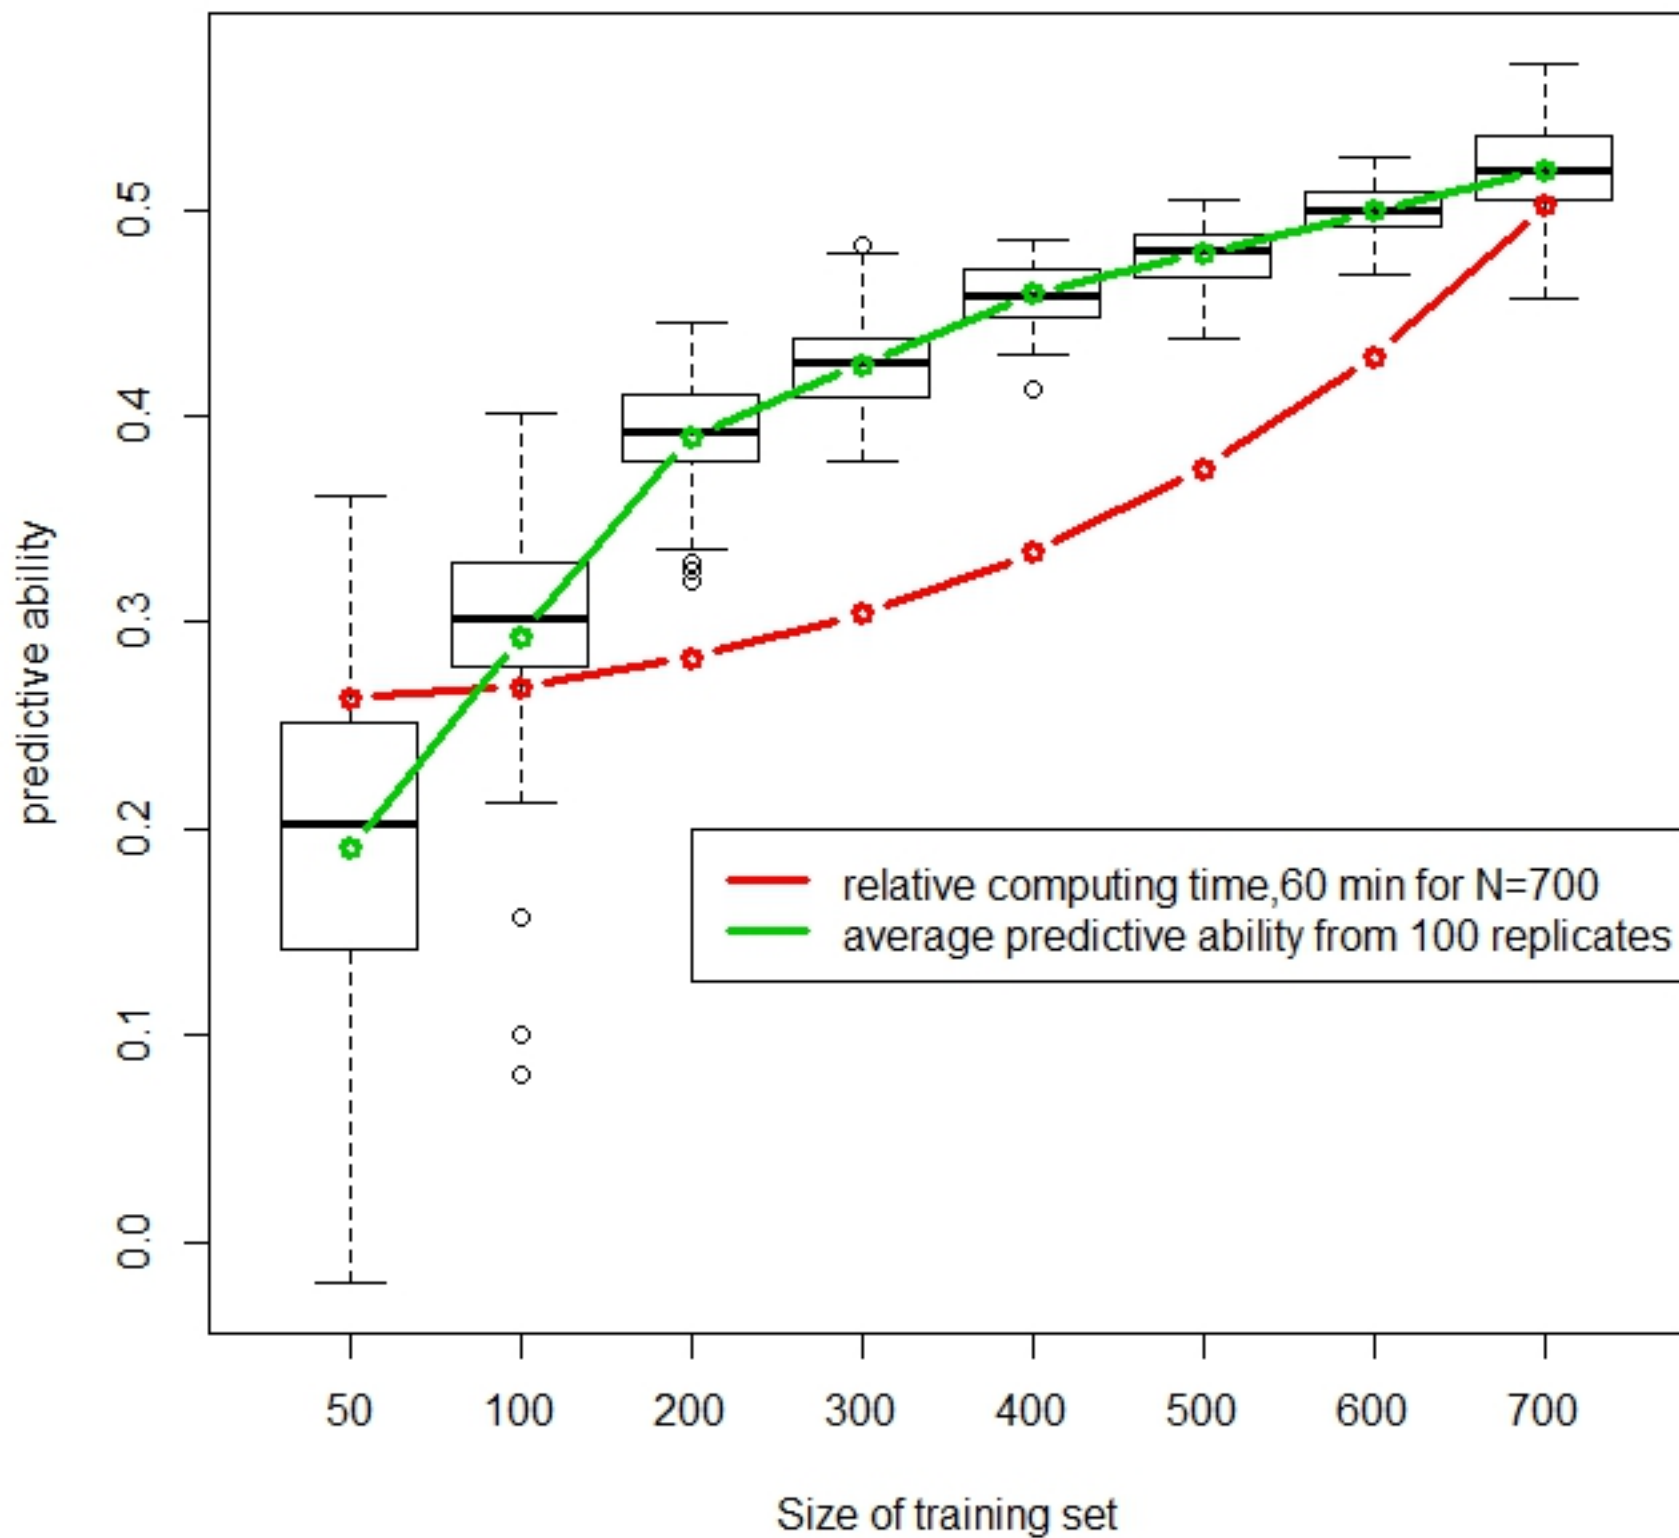

Figure



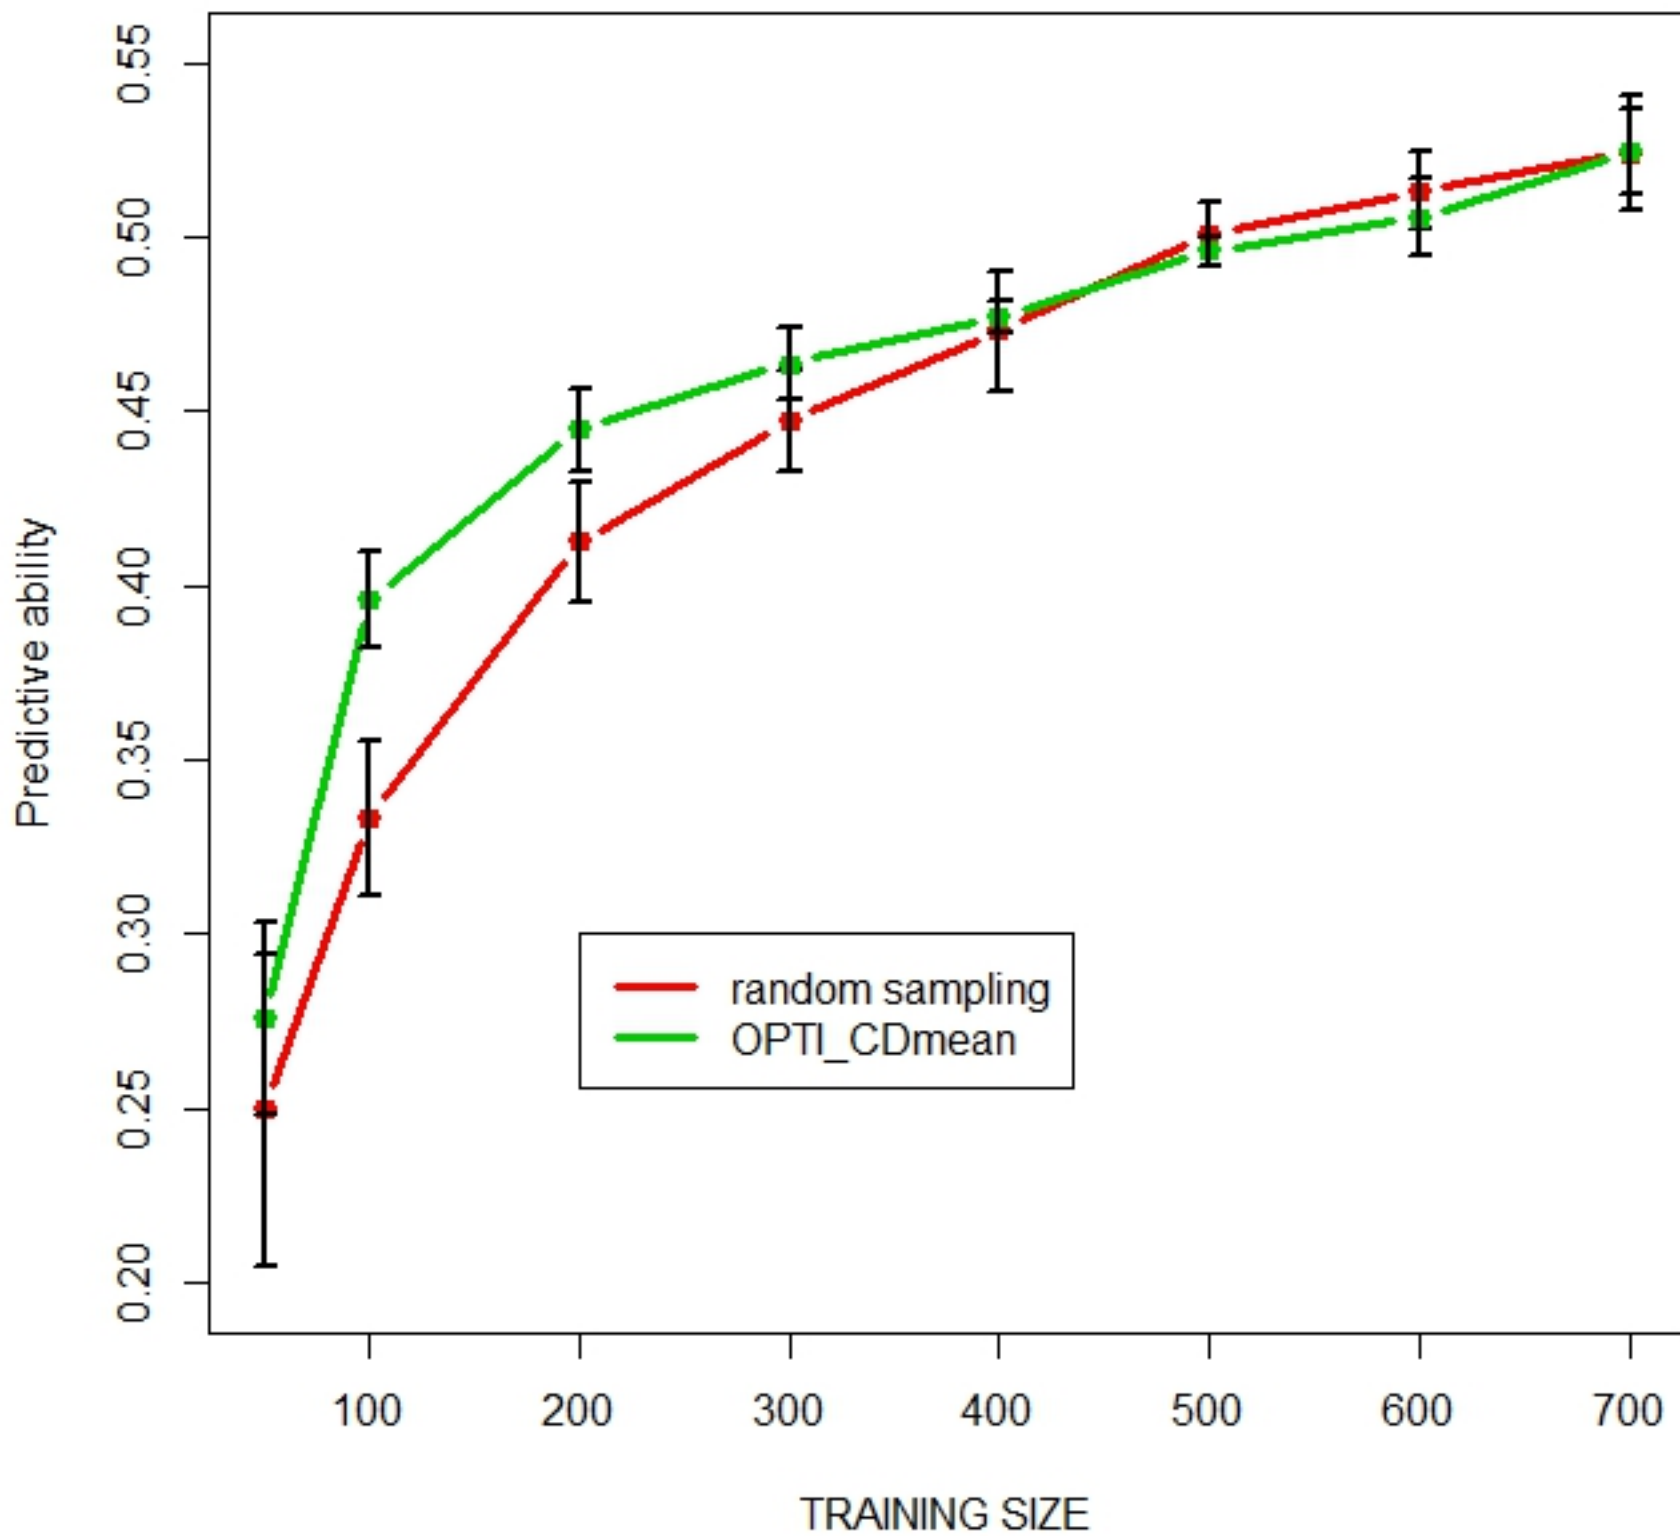

Figure

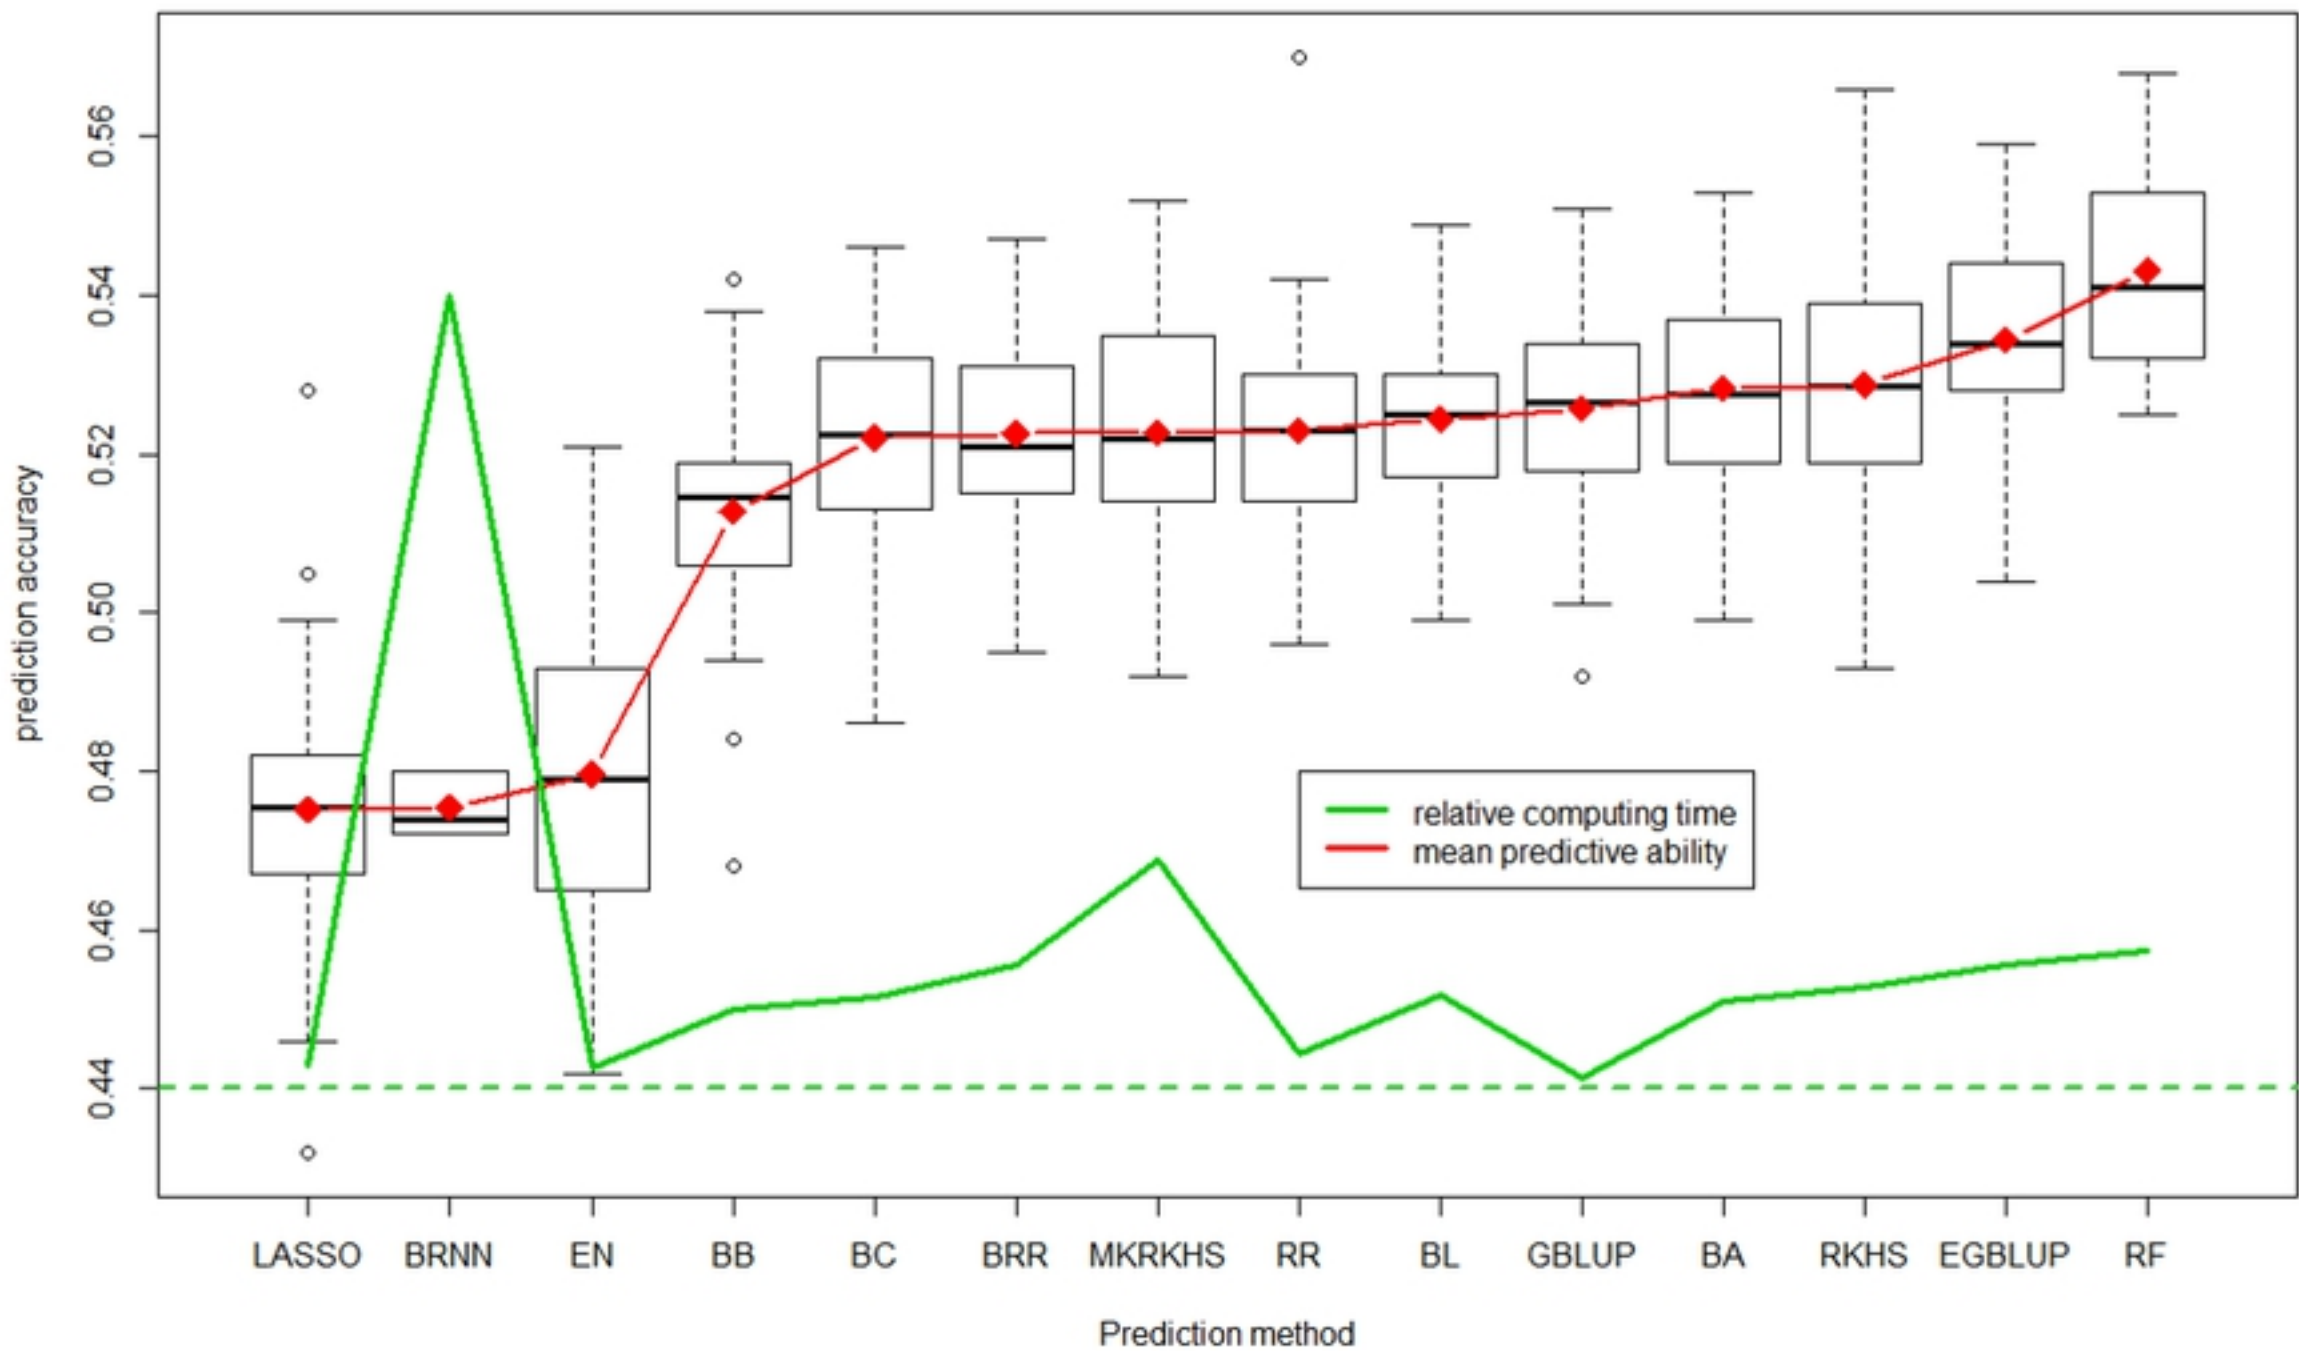

Figure

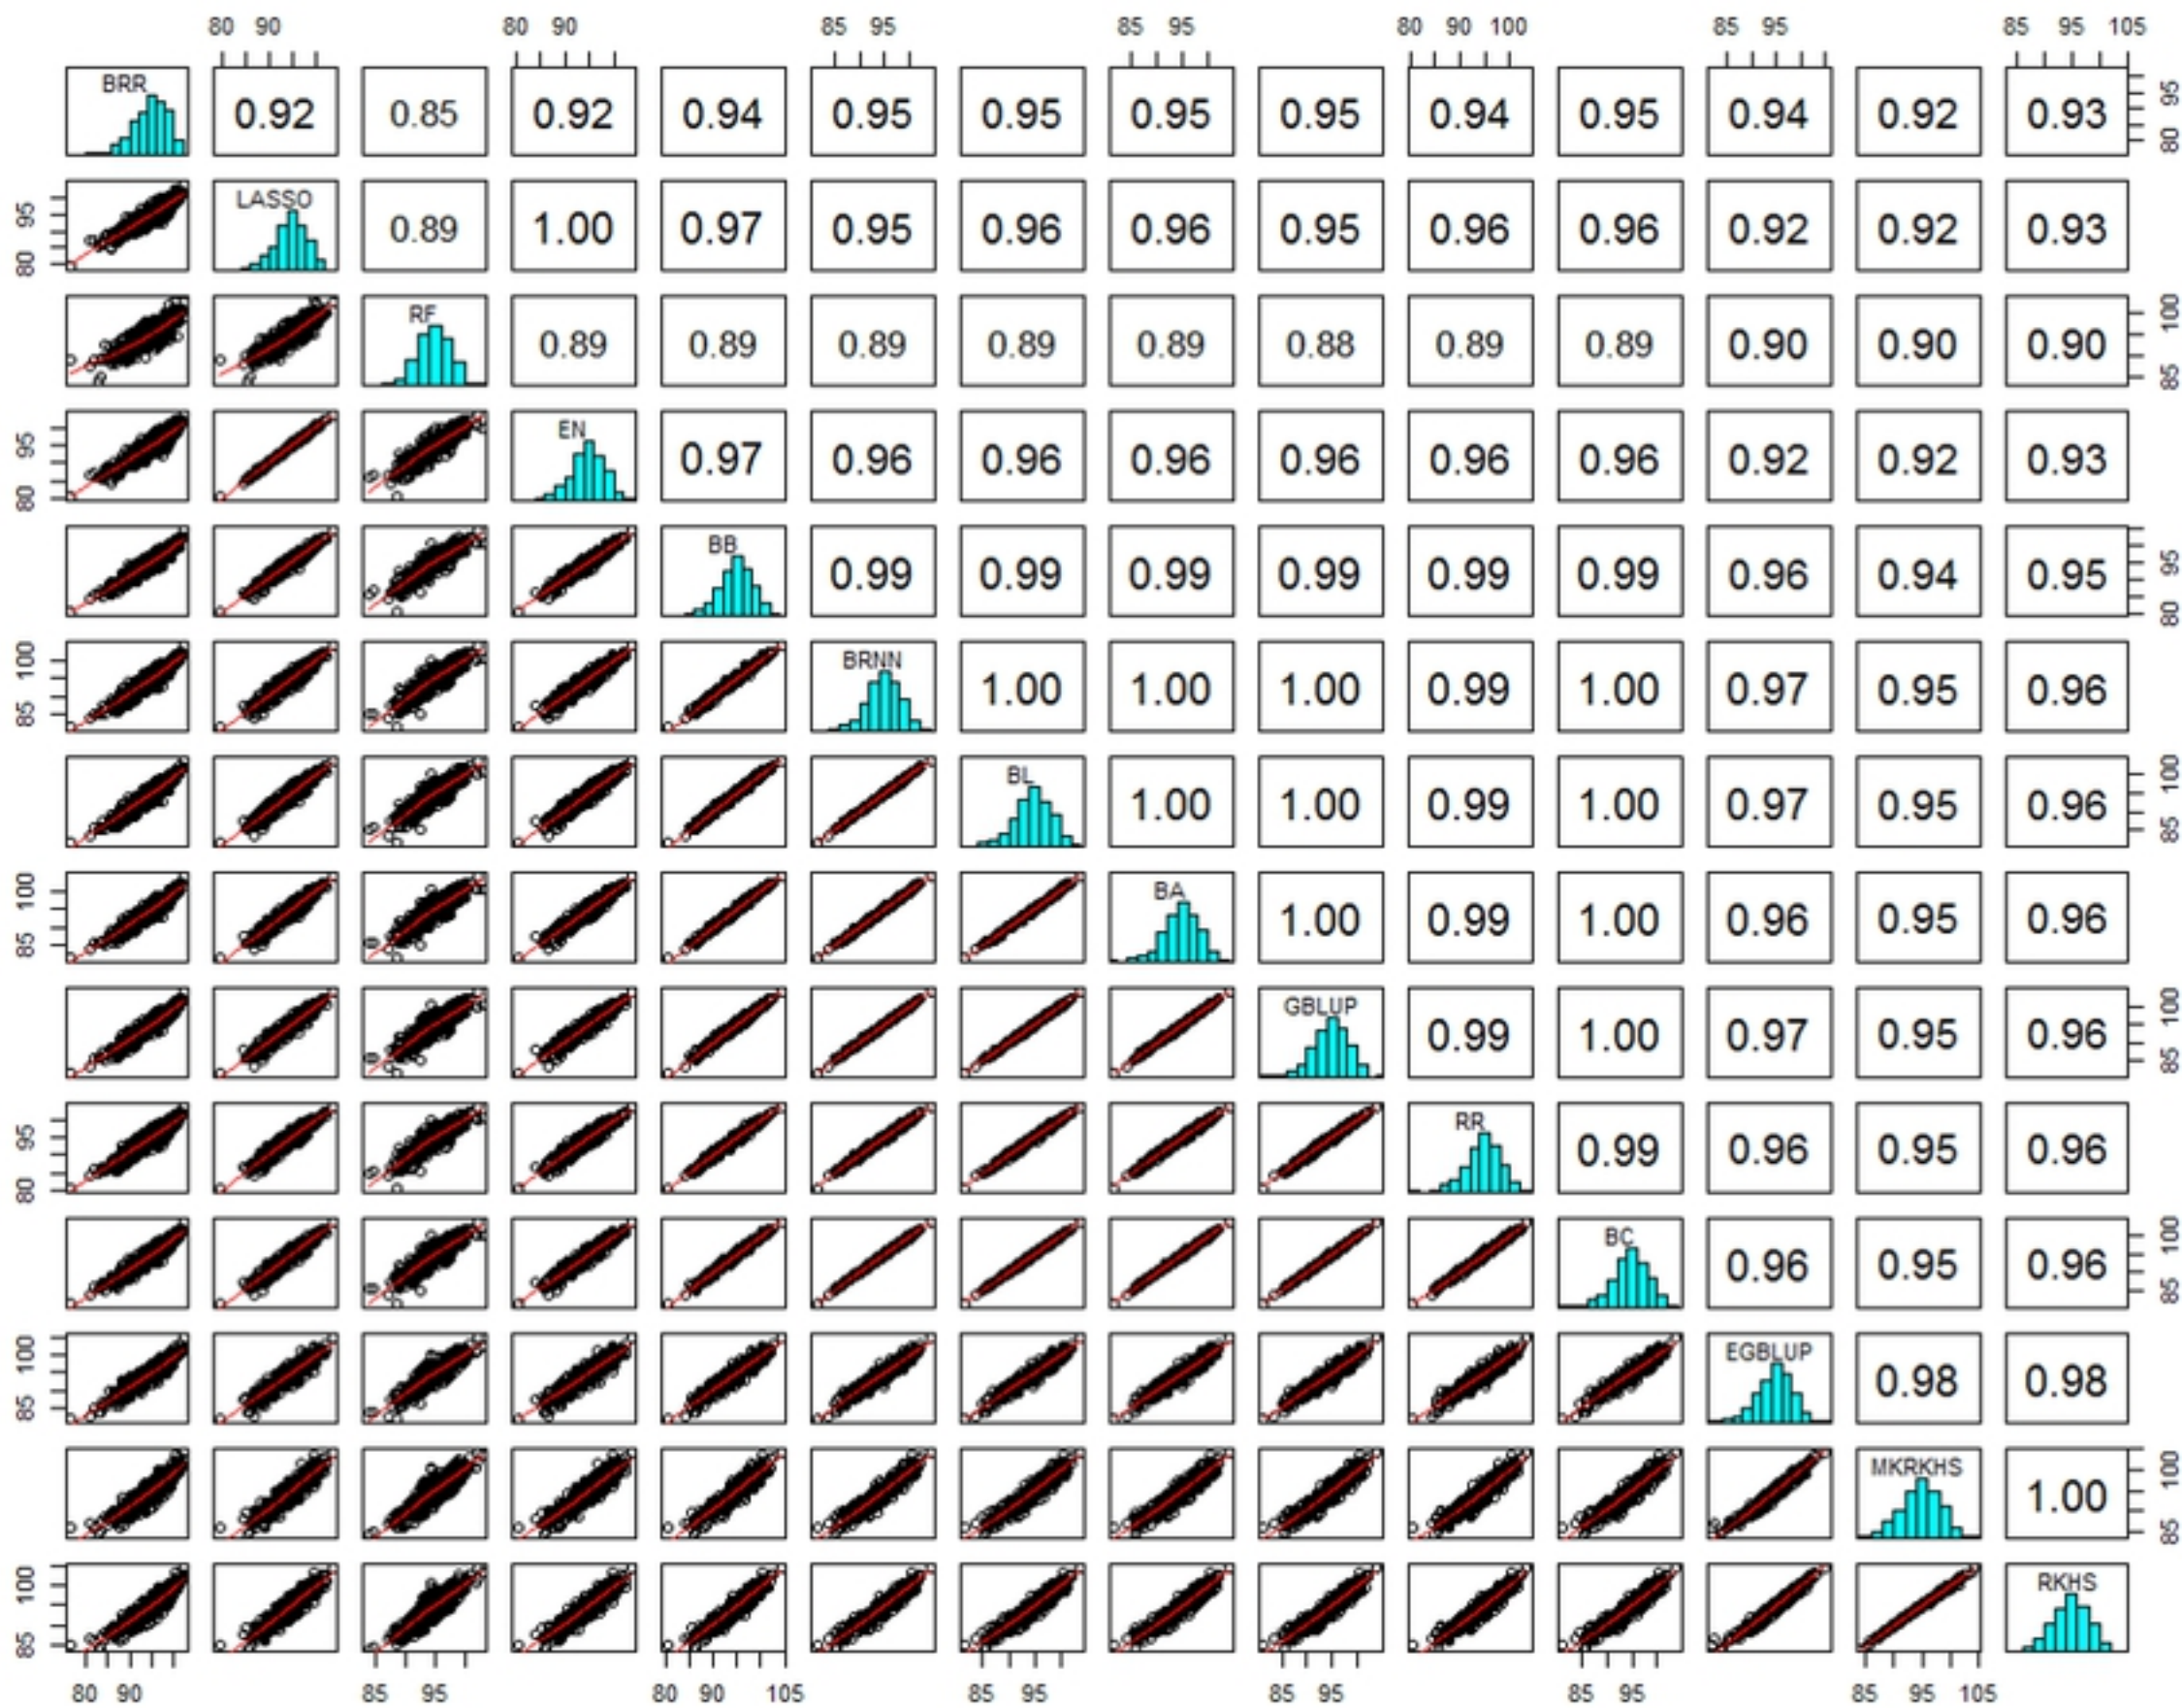

Figure
